# Supplementary material for: Small AntiMicrobial Peptide with In Vivo Activity Against Sepsis
Source: PubMed Central journal article supplement (PMC6539432; doi:10.3390/molecules24091702), 2019-05-01
Supplement: molecules-24-01702-s001.pdf [file molecules-24-01702-s001.pdf]

# $^1\text{H}$ and $^{13}\text{C}$ NMR spectra

$^1\text{H}$  NMR spectra of methyl 2,4-dicyano-2-(2-cyanoethyl)butanoate **23**, 250 MHz,  $\text{CDCl}_3$

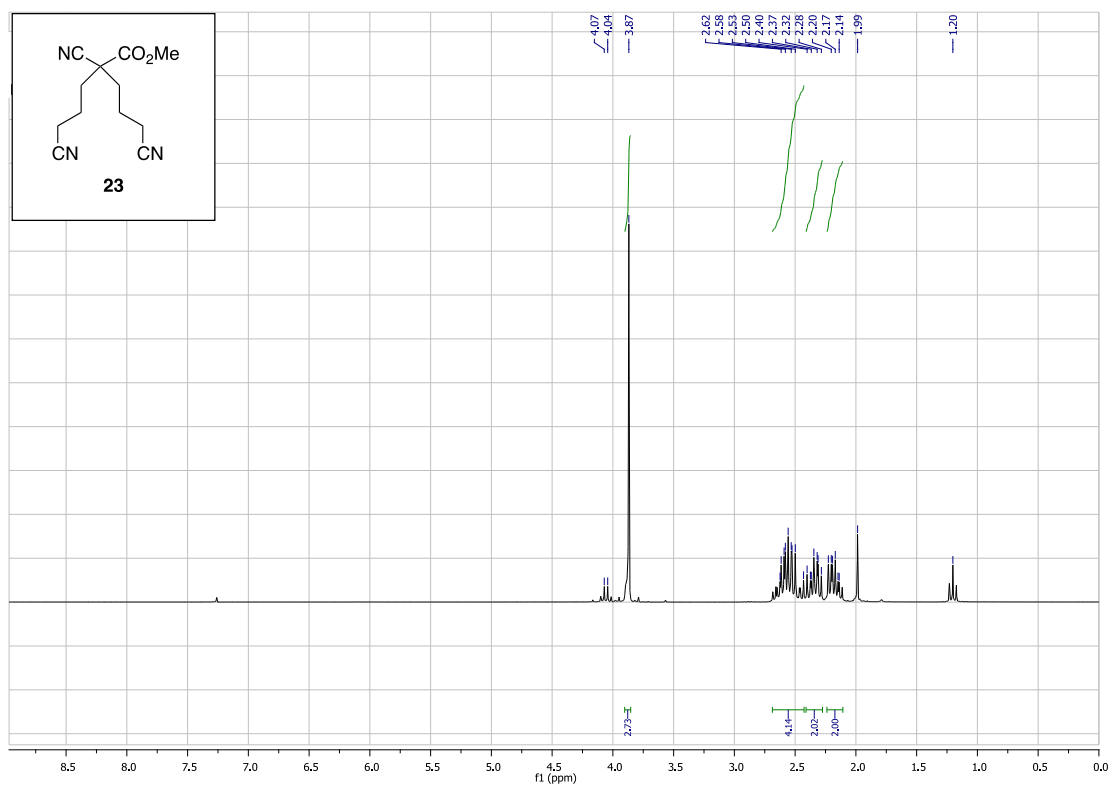

<sup>13</sup>C NMR spectra of methyl 2,4-dicyano-2-(2-cyanoethyl)butanoate **23**, 75 MHz, CDCl<sub>3</sub>

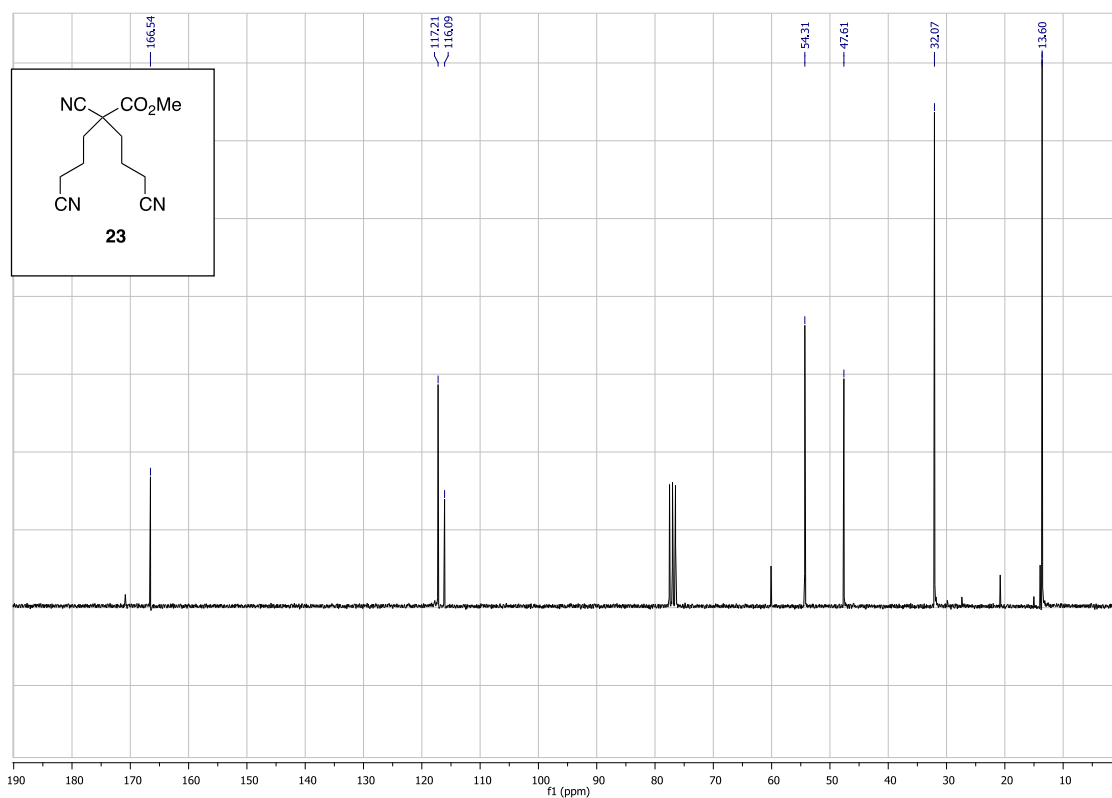

<sup>1</sup>H NMR spectra of methyl 2-cyano-4-(Boc)amine-2-(3-(Boc)amine propyl)pentanoate **4**, 300 MHz, CDCl<sub>3</sub>

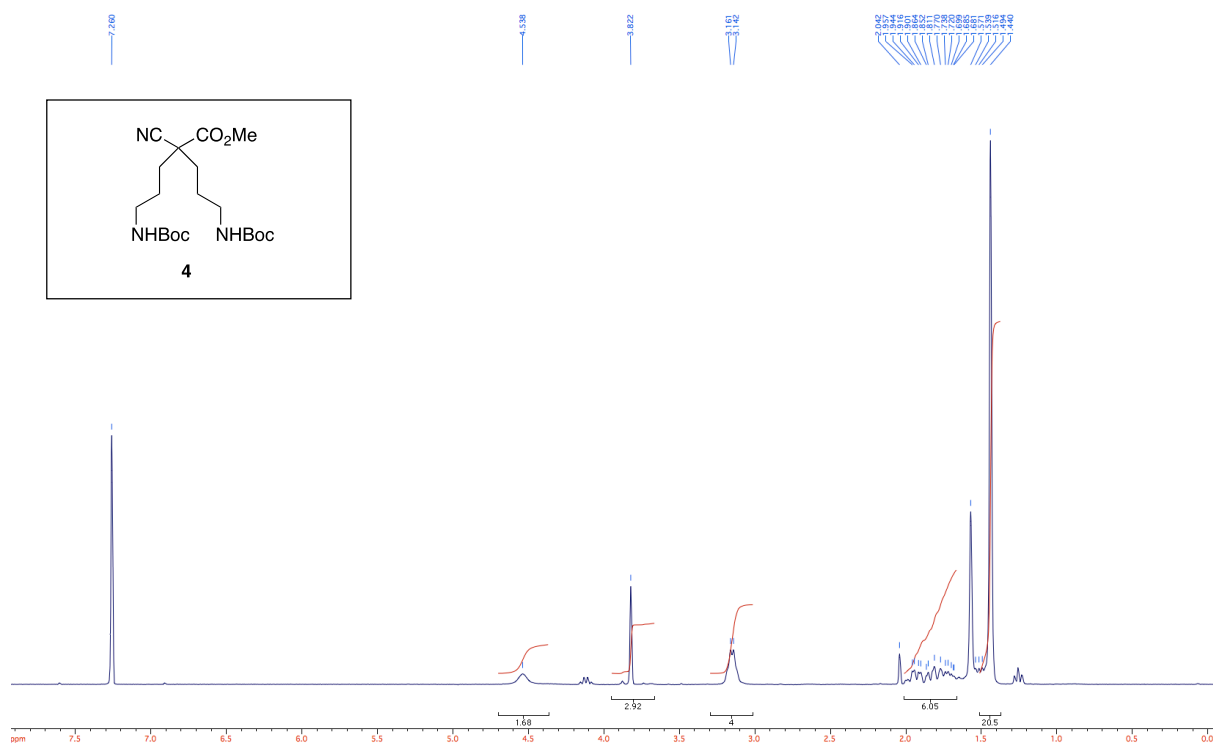

**<sup>13</sup>C NMR spectra of methyl 2-cyano-4-(Boc)amine-2-(3-(Boc)amine propyl)pentanoate 4, 75 MHz, CDCl<sub>3</sub>**

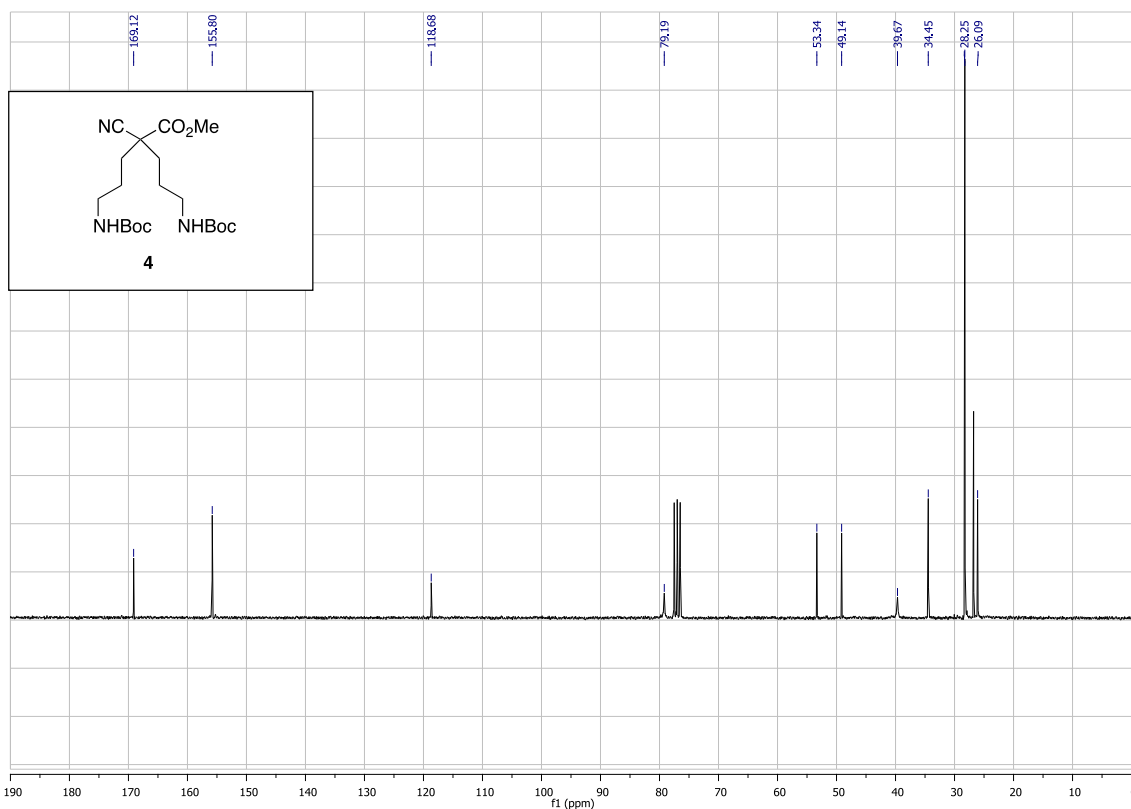

**<sup>1</sup>H NMR spectra of H-β<sup>2,2</sup>h bis-Orn(Boc)<sub>2</sub>OMe 1, 300 MHz, CD<sub>3</sub>OD**

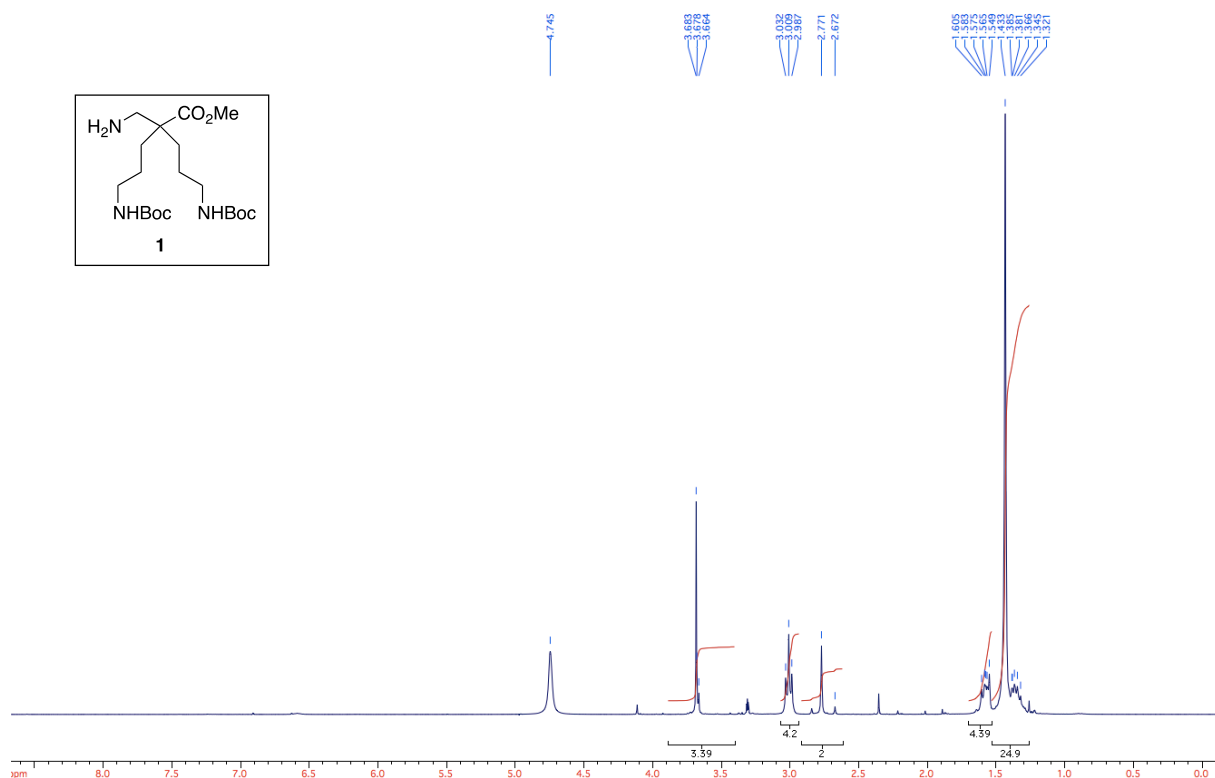

**<sup>13</sup>C NMR spectra of H-β<sup>2,2</sup>h bis-Orn(Boc)<sub>2</sub>OMe 1, 75 MHz, CD<sub>3</sub>OD**

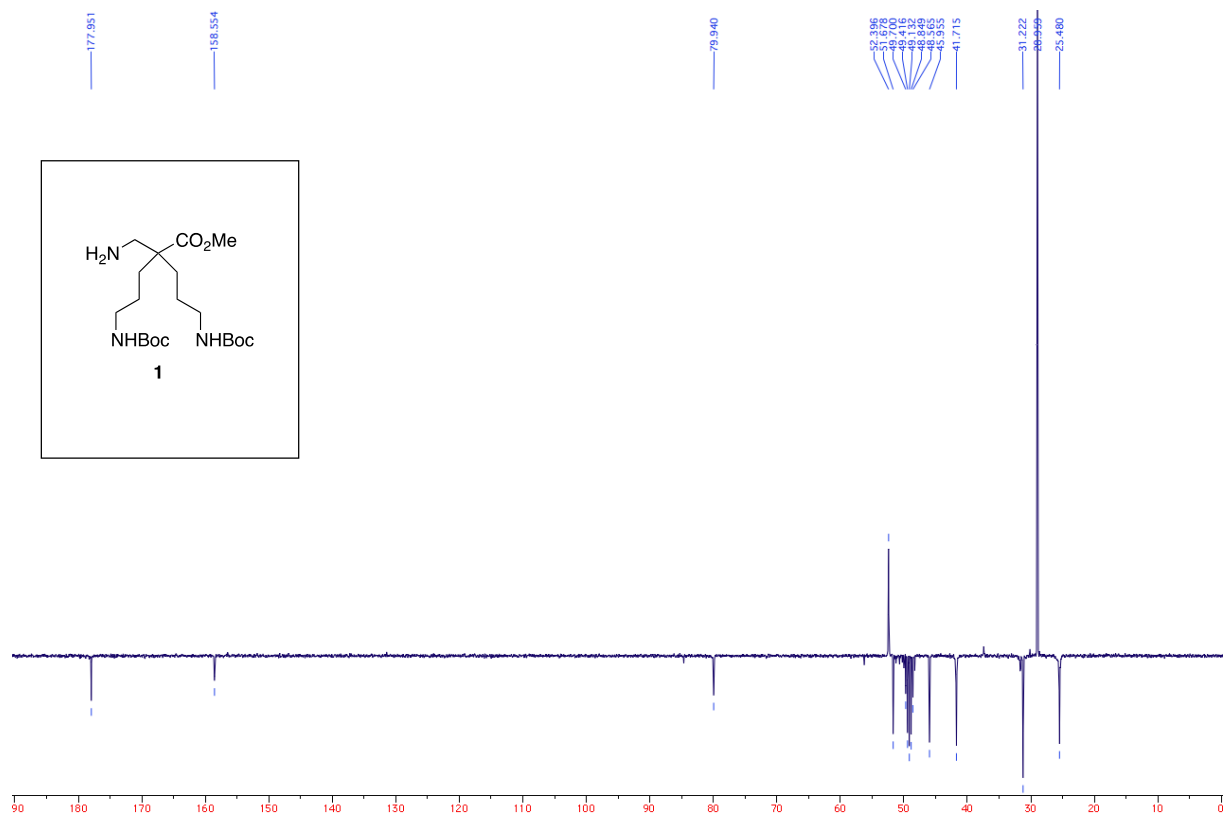

<sup>1</sup>H NMR spectra of Fmoc β<sup>2,2</sup>h bis-Orn(Boc)<sub>2</sub>OH 2, 250 MHz, CDCl<sub>3</sub>

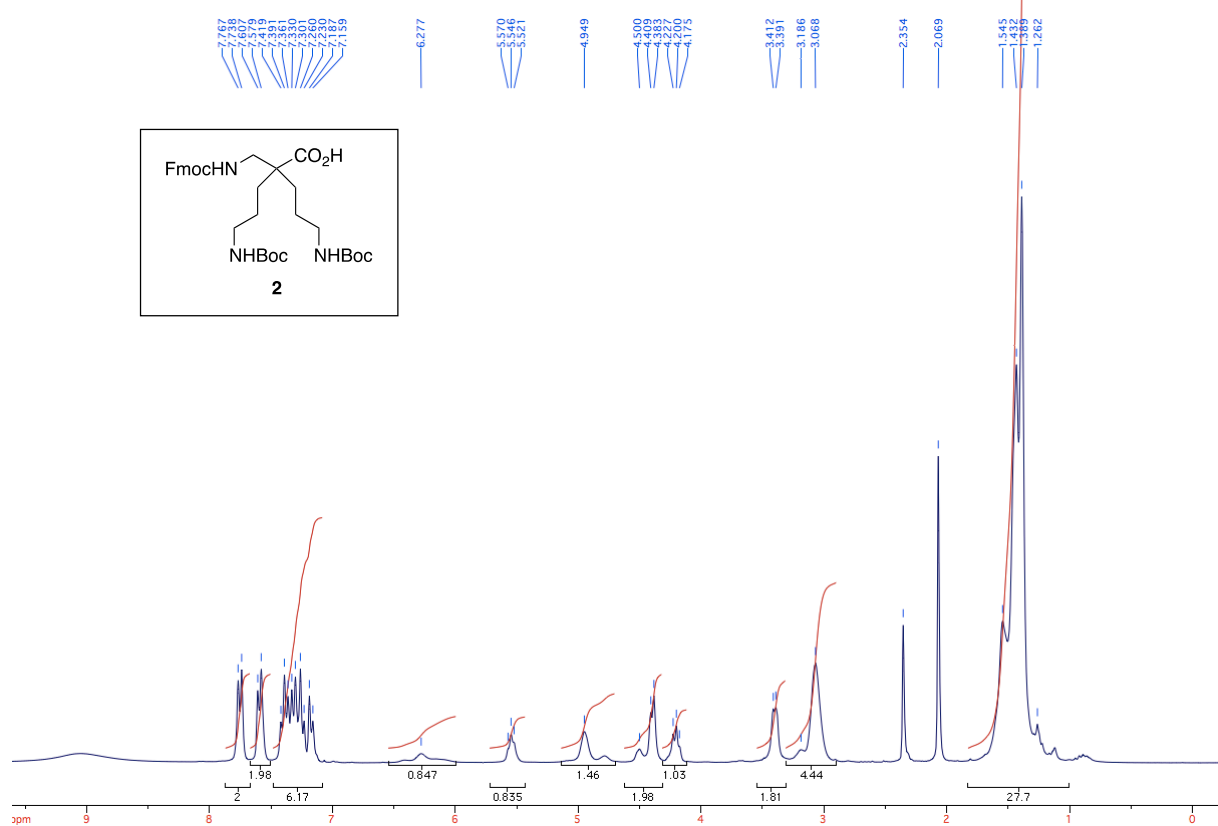

<sup>13</sup>C NMR spectra of Fmoc β<sup>2,2</sup>h bis-Orn(Boc)<sub>2</sub>OH 2, 75 MHz, CDCl<sub>3</sub>

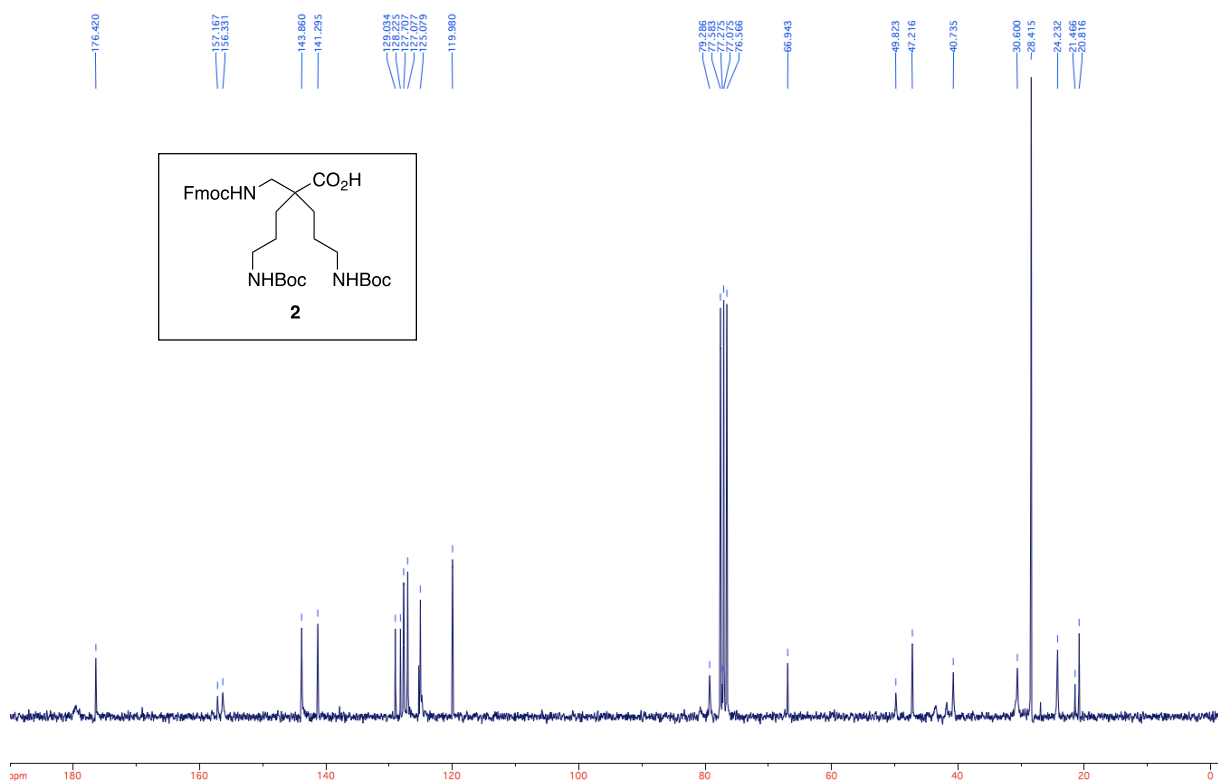

<sup>1</sup>H NMR spectra of 1-benzyl 3-tert-butyl 2,2-bis(2-cyanoethyl)malonate 24, 250 MHz, CDCl<sub>3</sub>

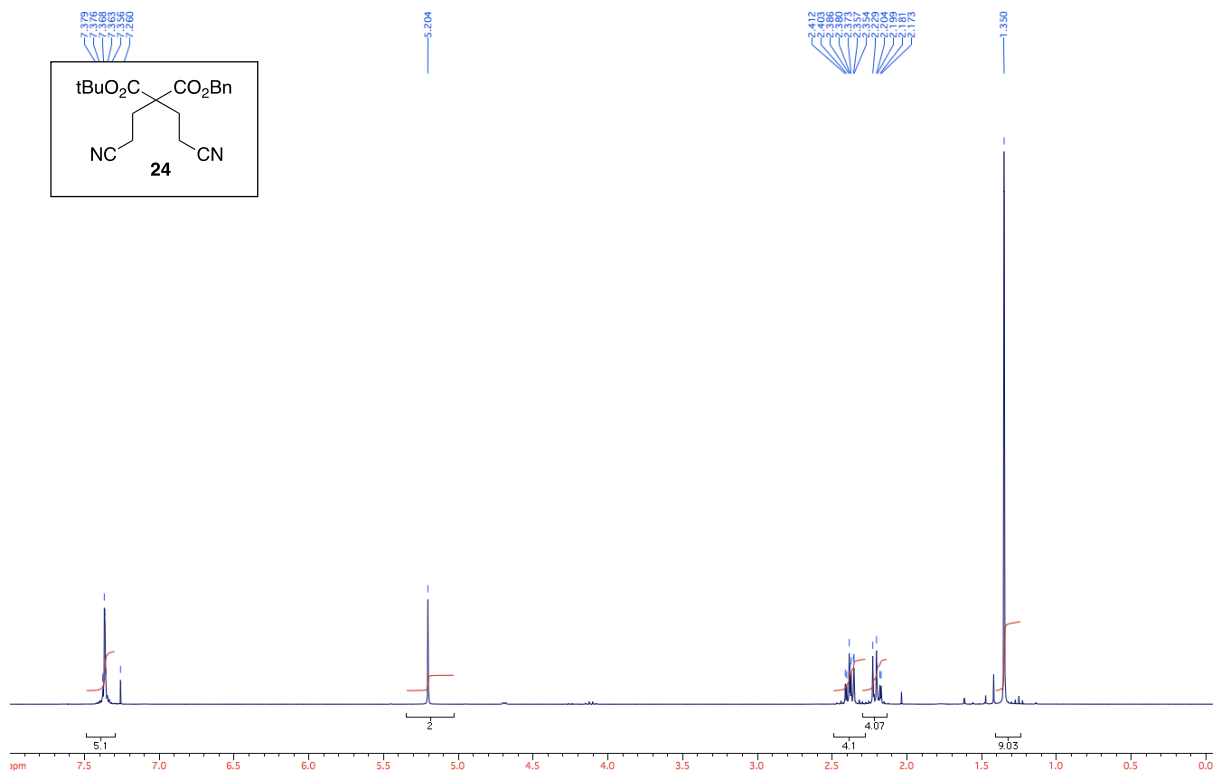

<sup>13</sup>C NMR spectra of 1-benzyl 3-*tert*-butyl 2,2-bis(2-cyanoethyl)malonate **24**, 62.5 MHz, CDCl<sub>3</sub>

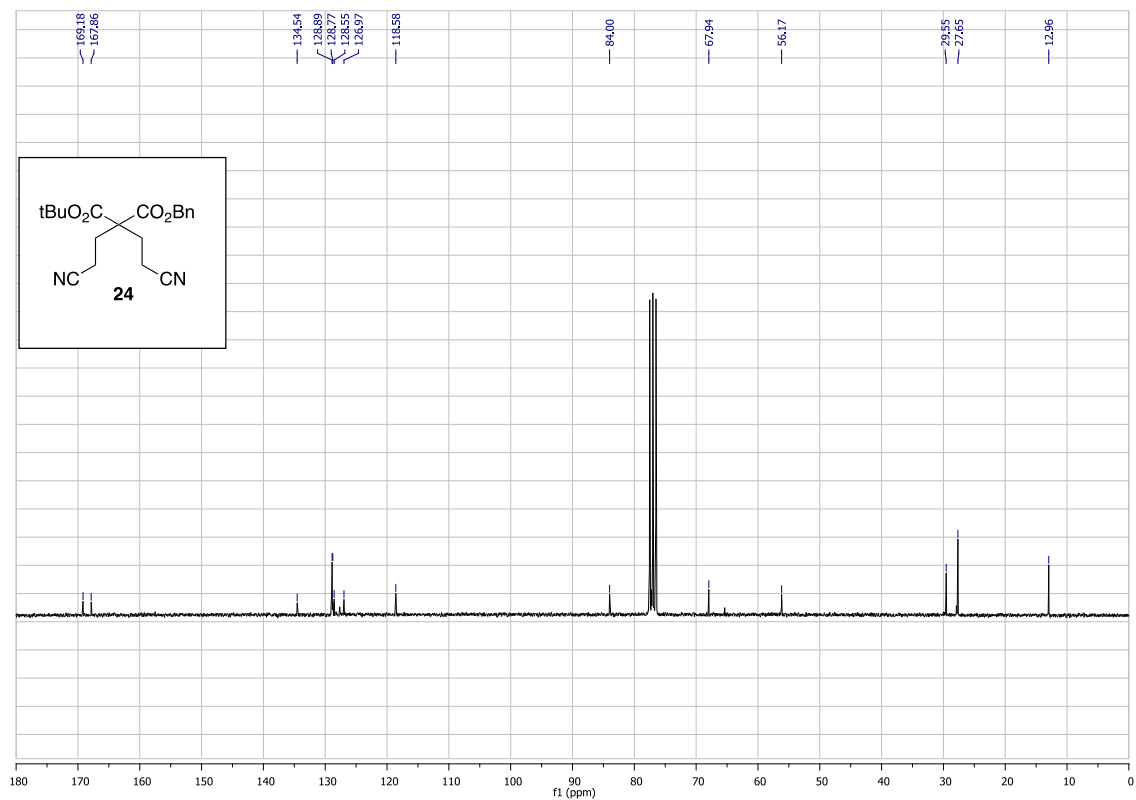

<sup>1</sup>H NMR spectra of 2-(tert-butoxycarbonyl)-4-cyano-2-(2-cyanoethyl)butanoic acid **5**, 300 MHz, CDCl<sub>3</sub>

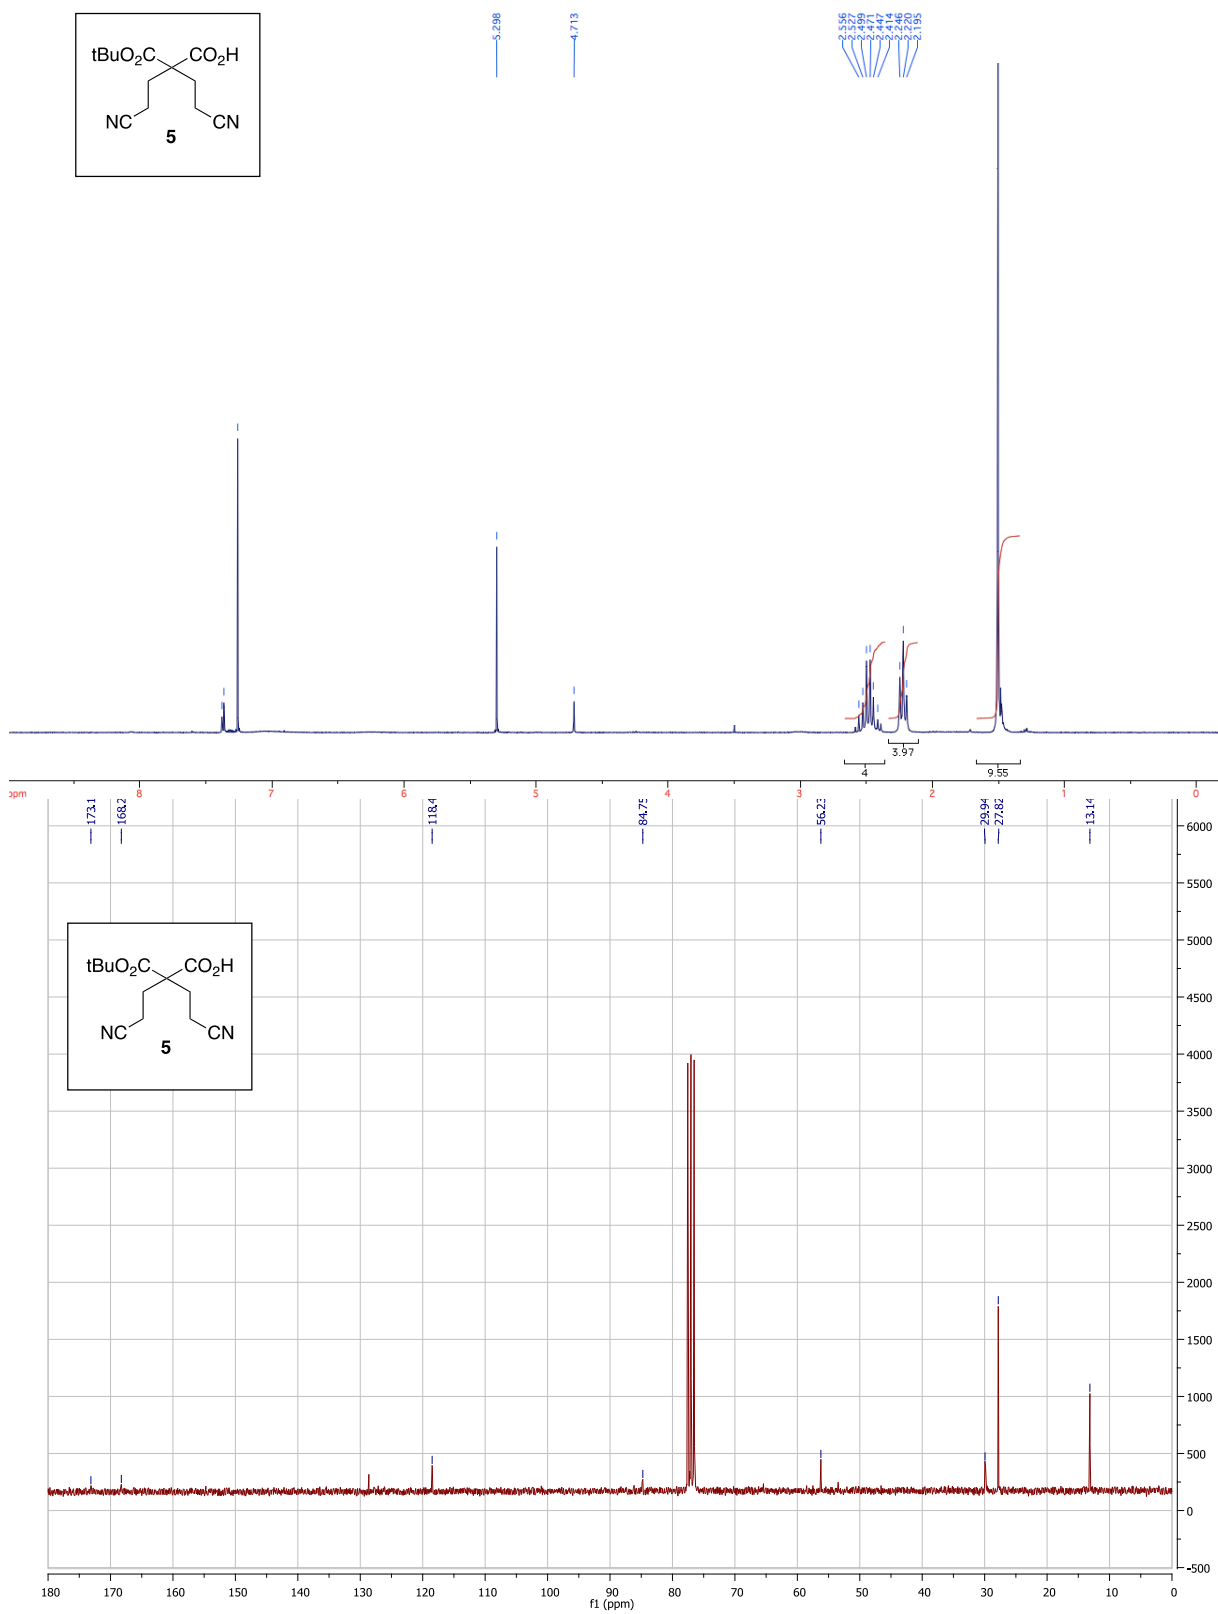

**<sup>1</sup>H NMR spectra of 1-tert-butyl 4-methyl 2,2-bis(2-cyanoethyl)succinate 6, 300 MHz, CDCl<sub>3</sub>**

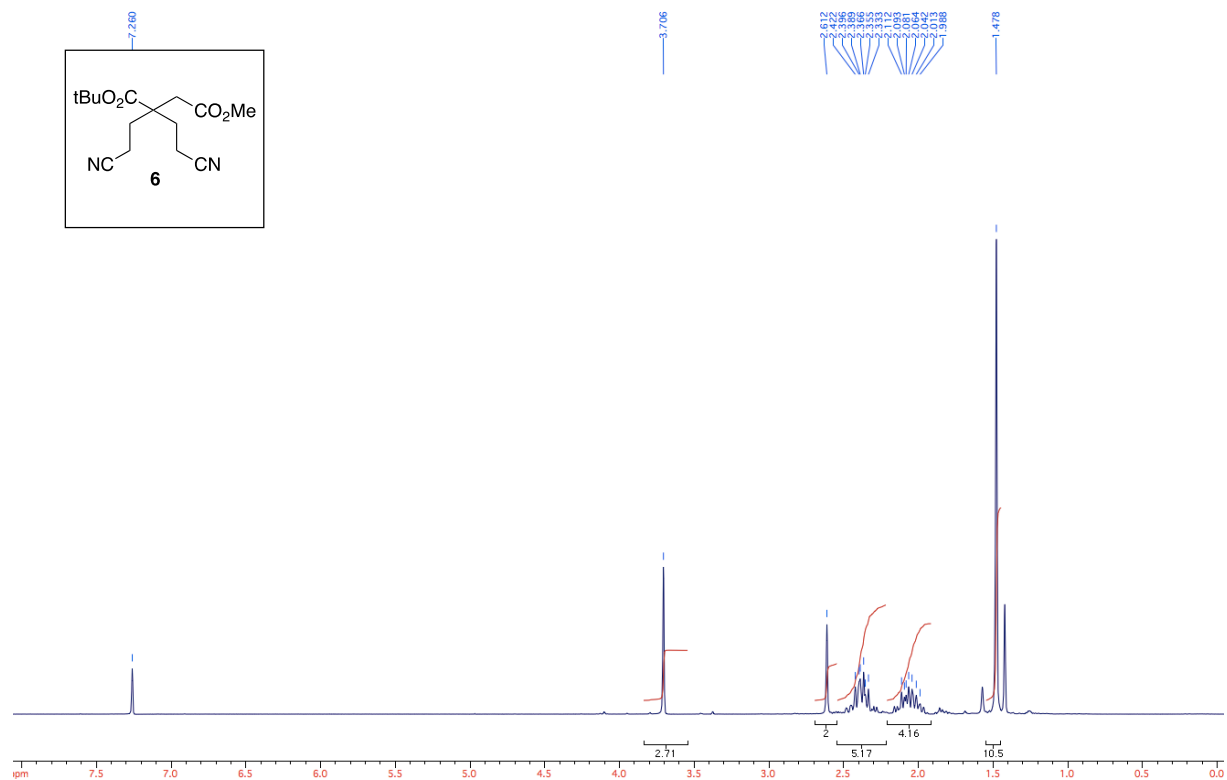

**<sup>13</sup>C NMR spectra of 1-tert-butyl 4-methyl 2,2-bis(2-cyanoethyl)succinate 6, 75 MHz, CDCl<sub>3</sub>**

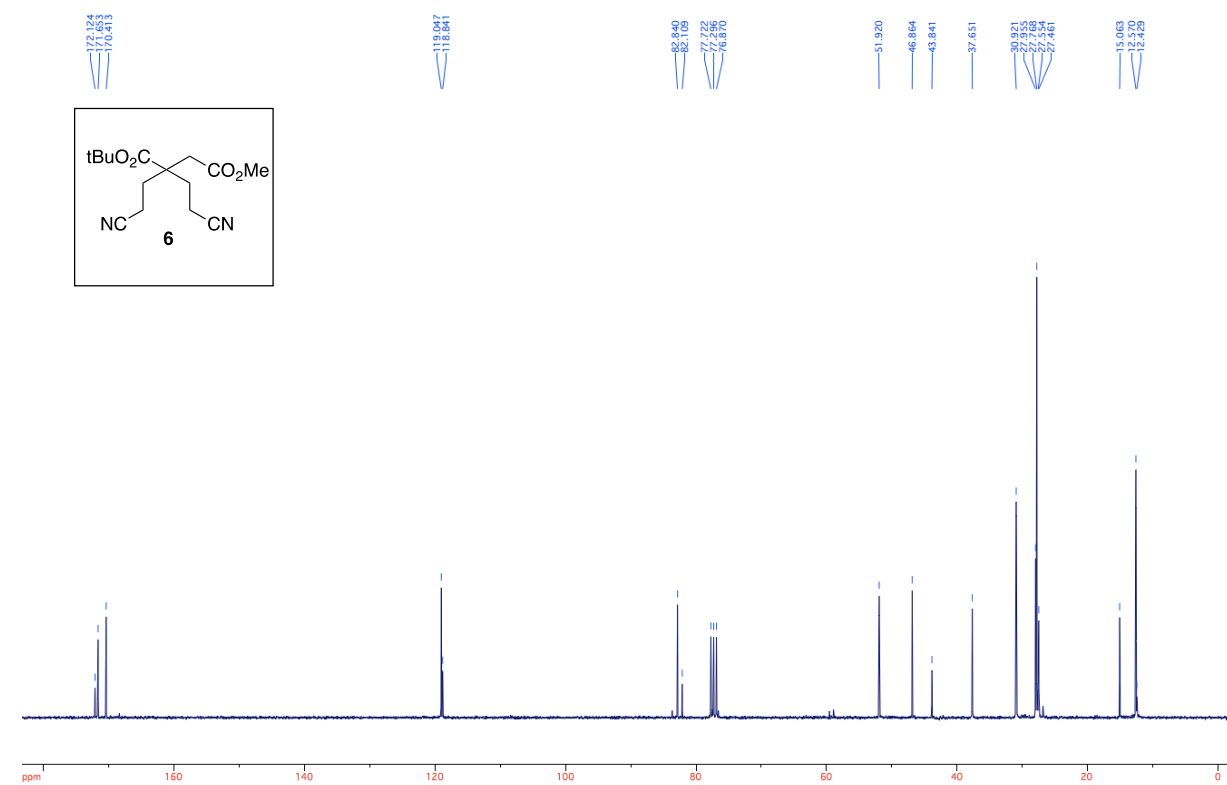



<sup>1</sup>H NMR spectra of 2,2-bis(2-cyanoethyl)-4-methoxy-4-oxobutanoic acid **25**, 300 MHz, CDCl<sub>3</sub>

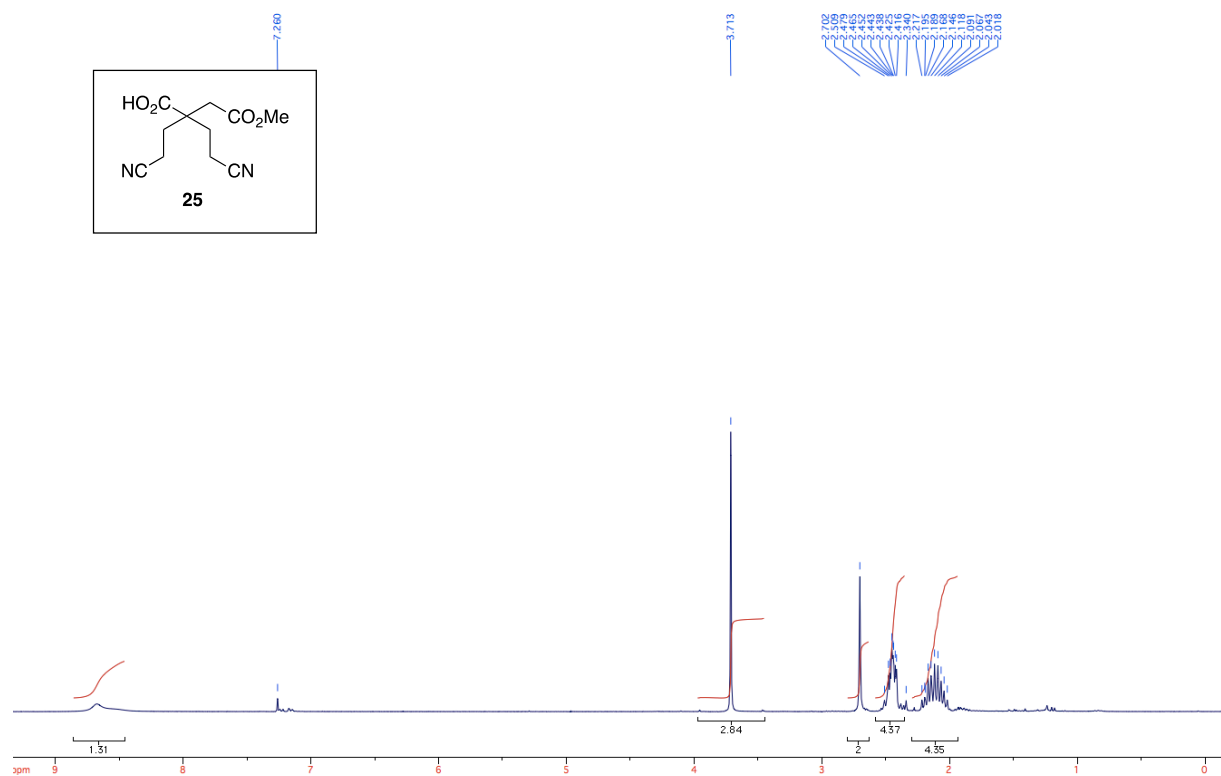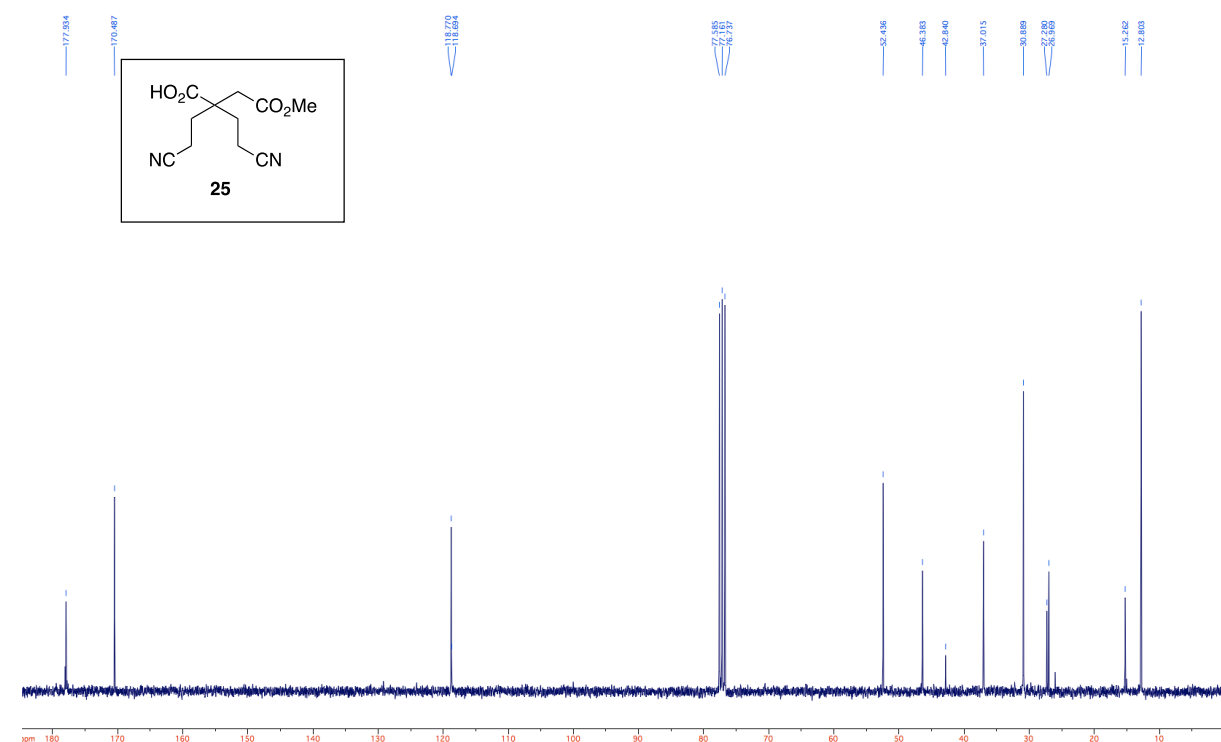

**<sup>1</sup>H NMR spectra of methyl 3-((tert-butoxycarbonyl)amino)-5-cyano-3-(2-cyanoethyl)pentanoate 7, 300 MHz, CDCl<sub>3</sub>**

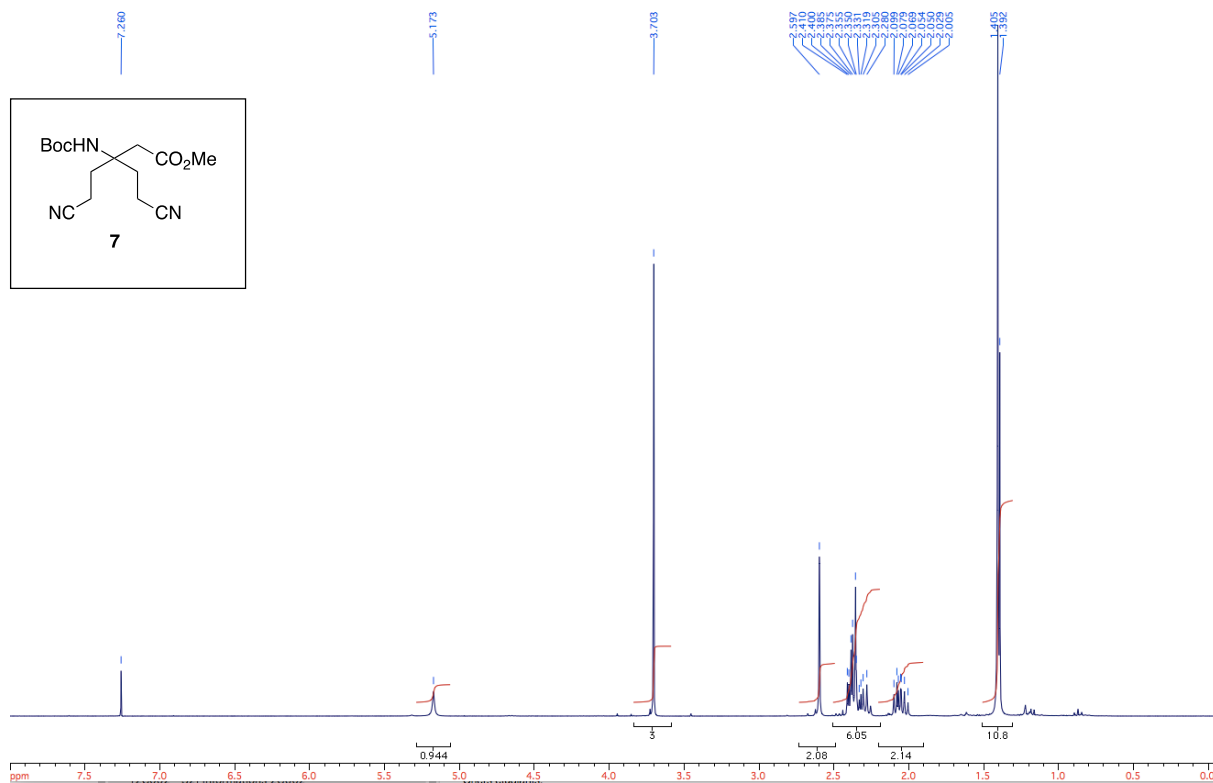

**<sup>13</sup>C NMR spectra of methyl 3-((tert-butoxycarbonyl)amino)-5-cyano-3-(2-cyanoethyl)pentanoate 7, 75 MHz, CDCl<sub>3</sub>**

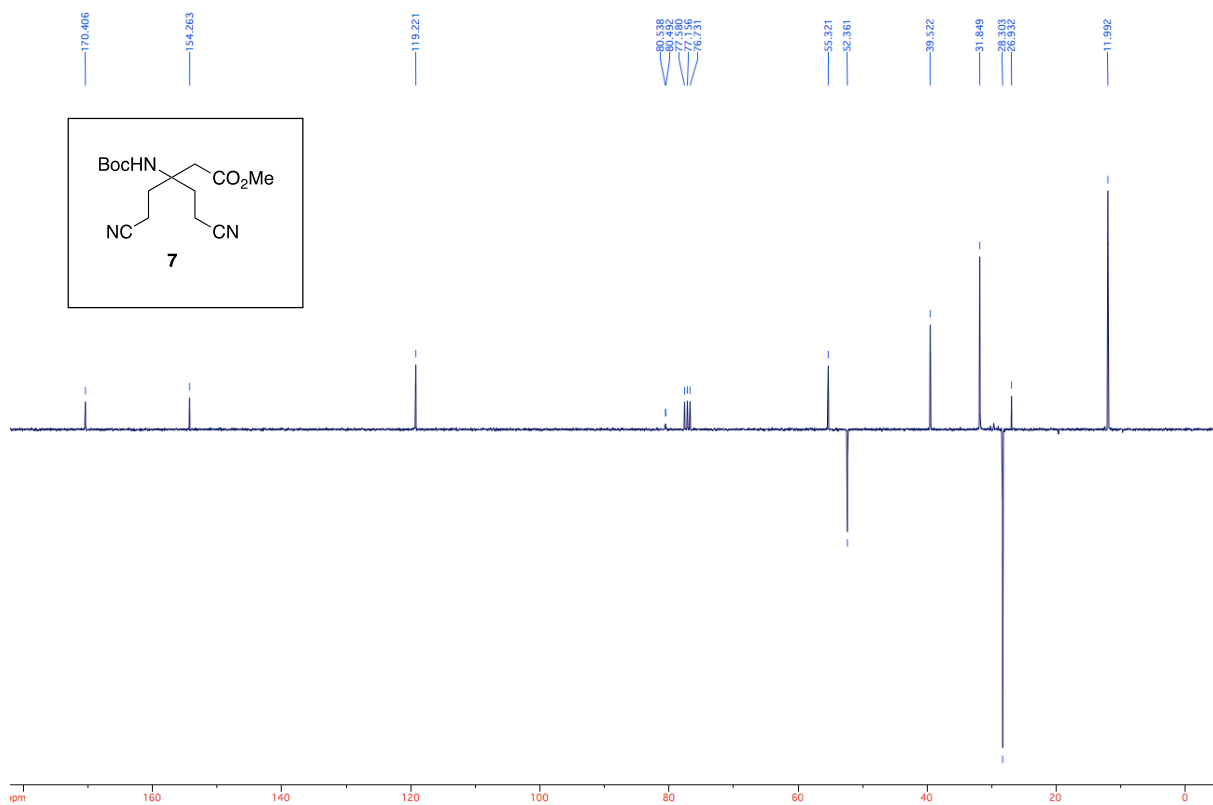

**$^1\text{H}$  NMR spectra of Boc- $\beta^{3,3}$  *h* bis-Orn(Boc) $_2$ OH 3, 300 MHz, CD $_3$ OD**

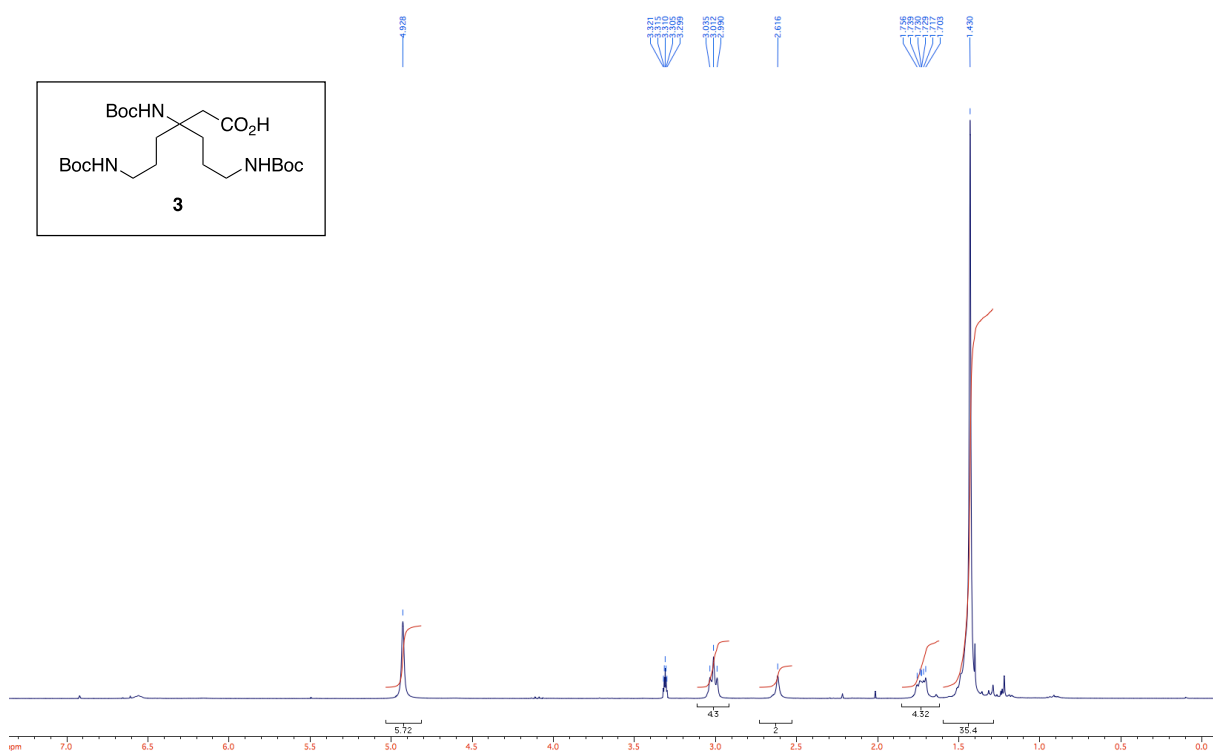

**$^{13}\text{C}$  NMR spectra of Boc- $\beta^{3,3}$  *h* bis-Orn(Boc) $_2$ OH 3, 75 MHz, CD $_3$ OD**

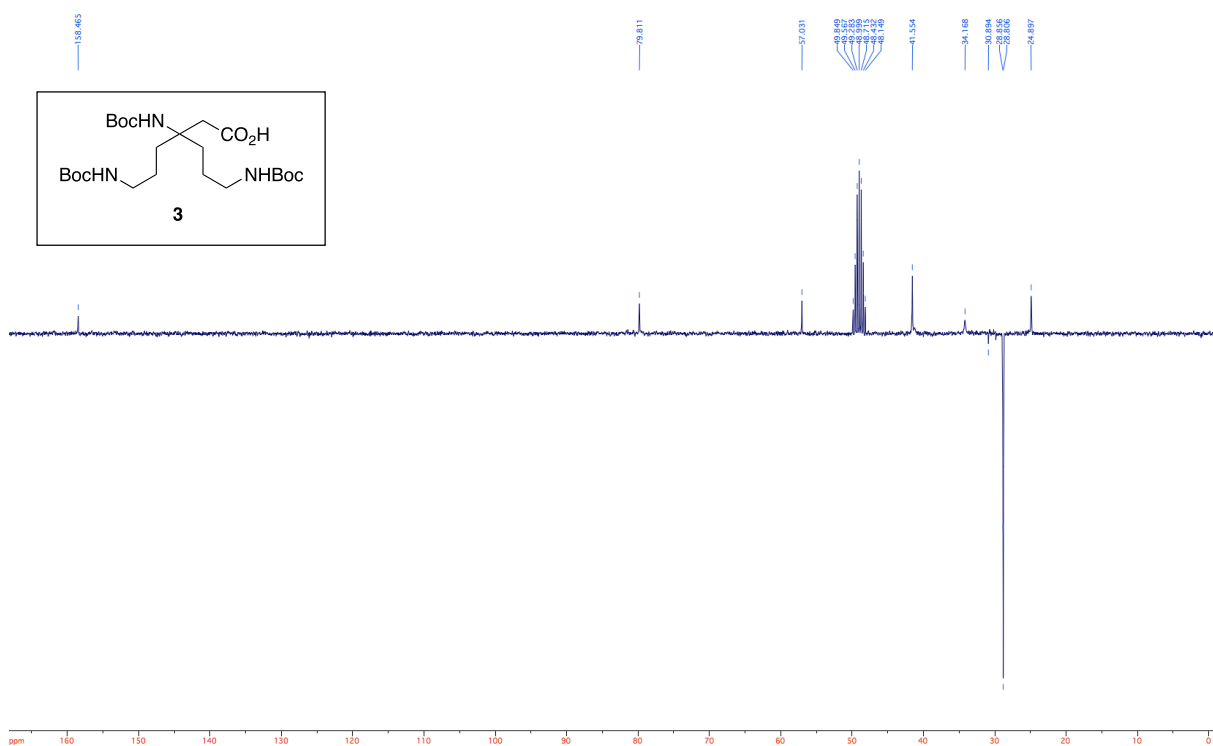

**<sup>1</sup>H NMR spectra of Boc Trp-β<sup>2,2</sup>h bis-Orn(Boc)<sub>2</sub>-OMe 15, 300MHz, CD<sub>3</sub>OD**

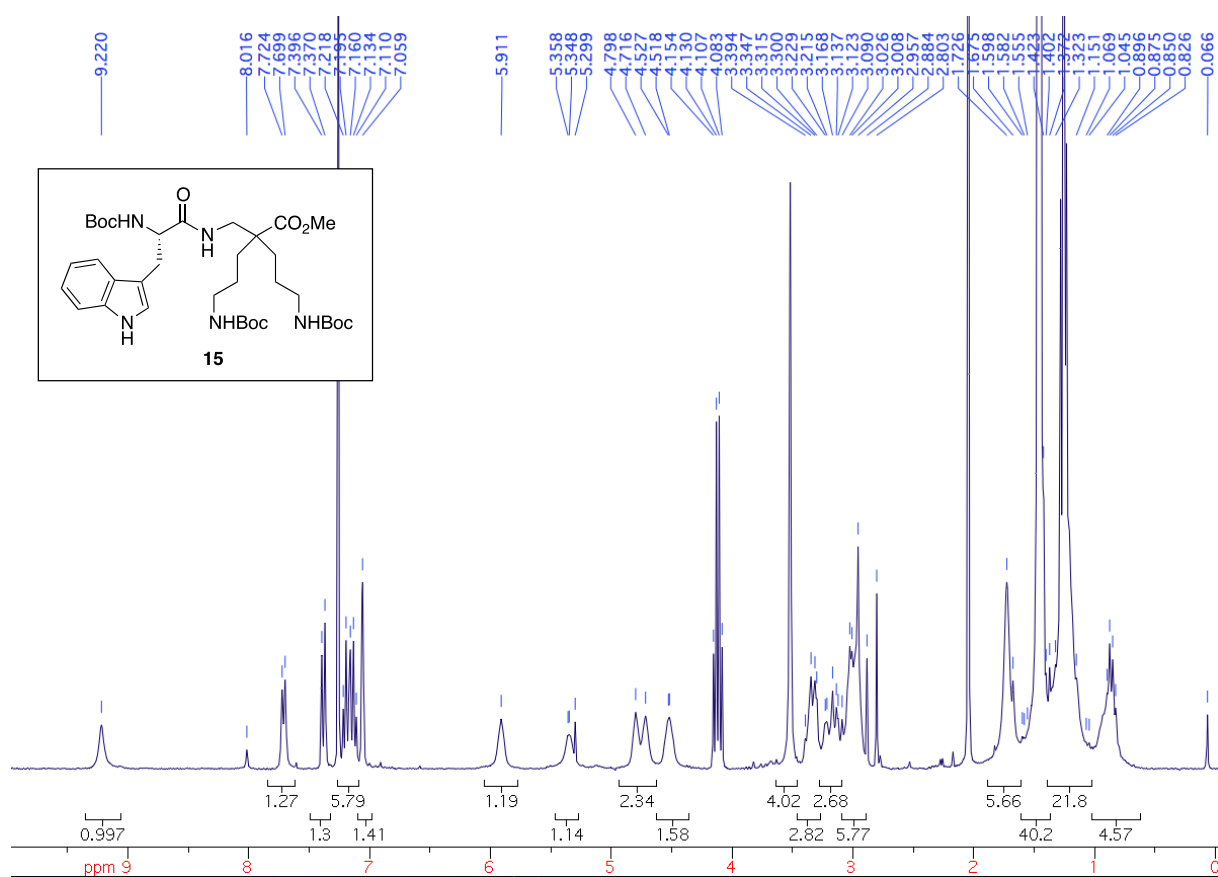

**<sup>1</sup>H NMR spectra of Trp-β<sup>2,2</sup>h bis-Orn-OMe 8, 300MHz, D<sub>2</sub>O**

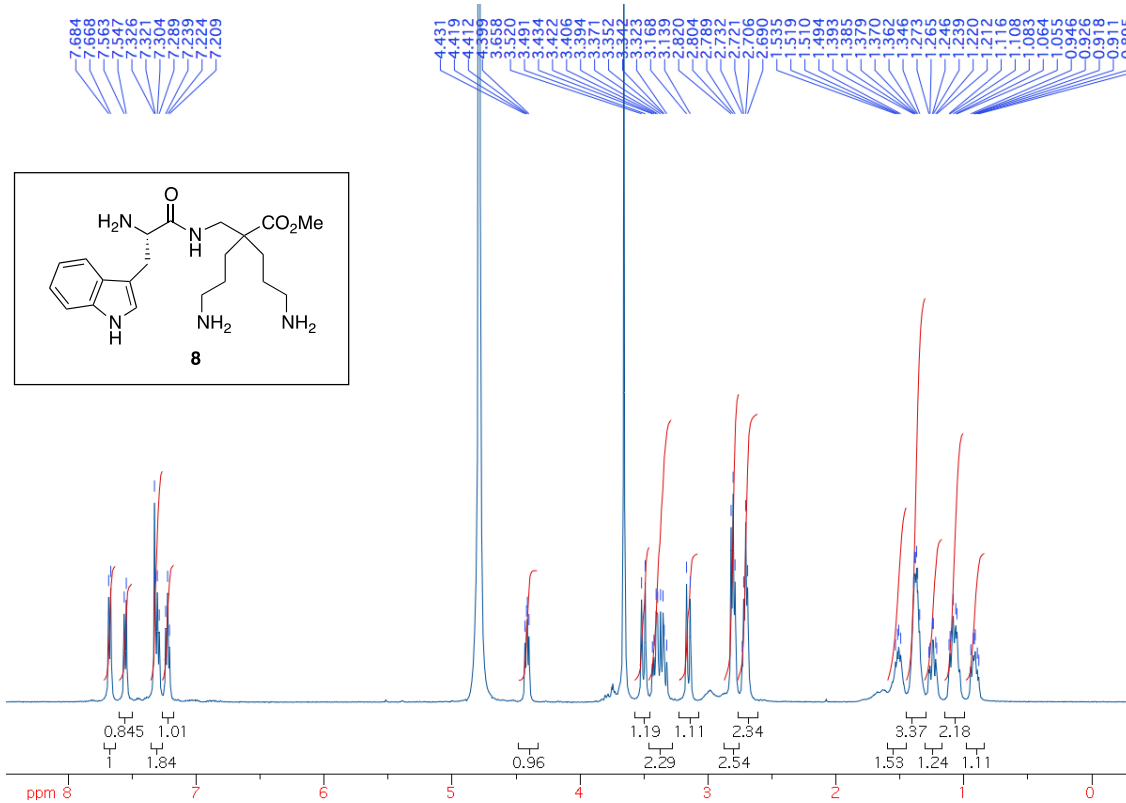

COSY NMR spectra of Trp- $\beta^{2,2}h$  bis-Orn-OMe 8, 300MHz, D<sub>2</sub>O

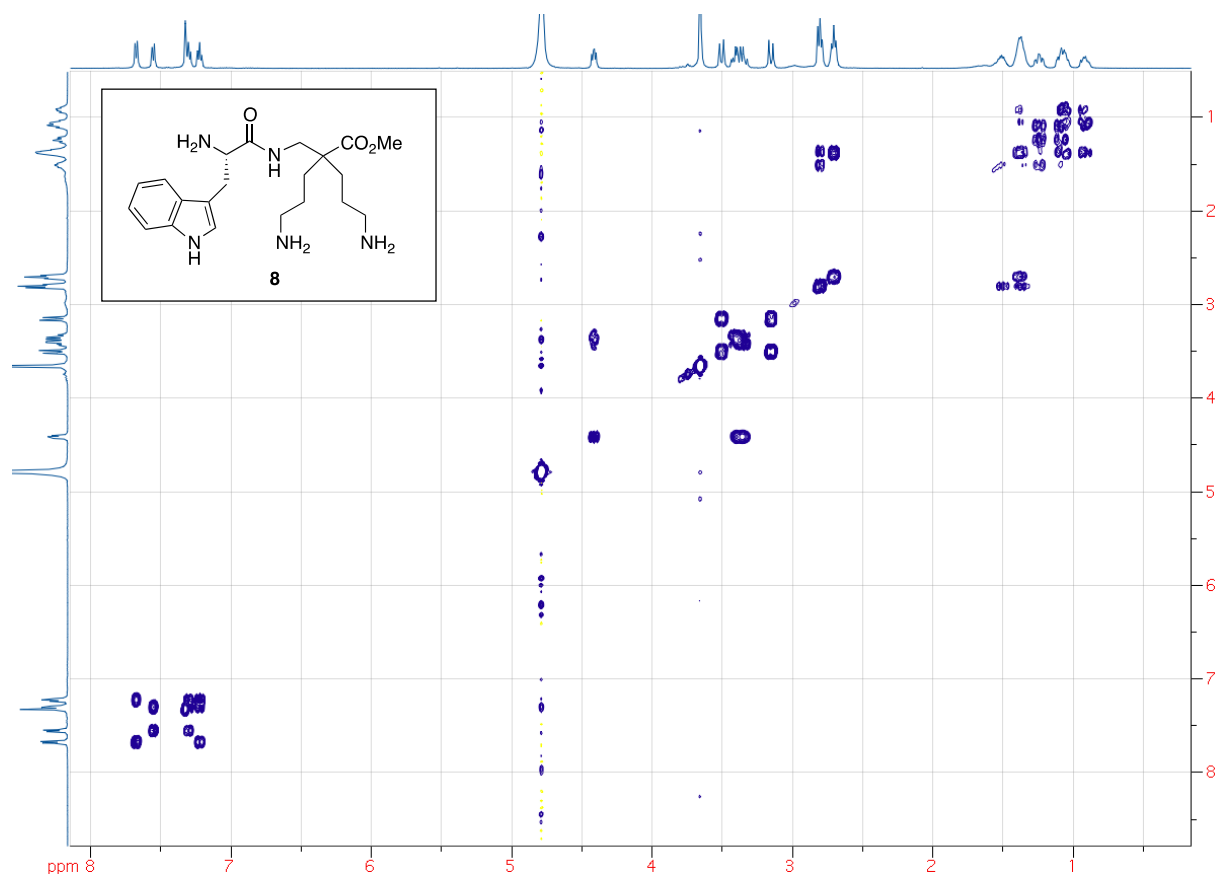

TOCSY NMR spectra of Trp- $\beta^{2,2}h$  bis-Orn-OMe 8, 300MHz, D<sub>2</sub>O

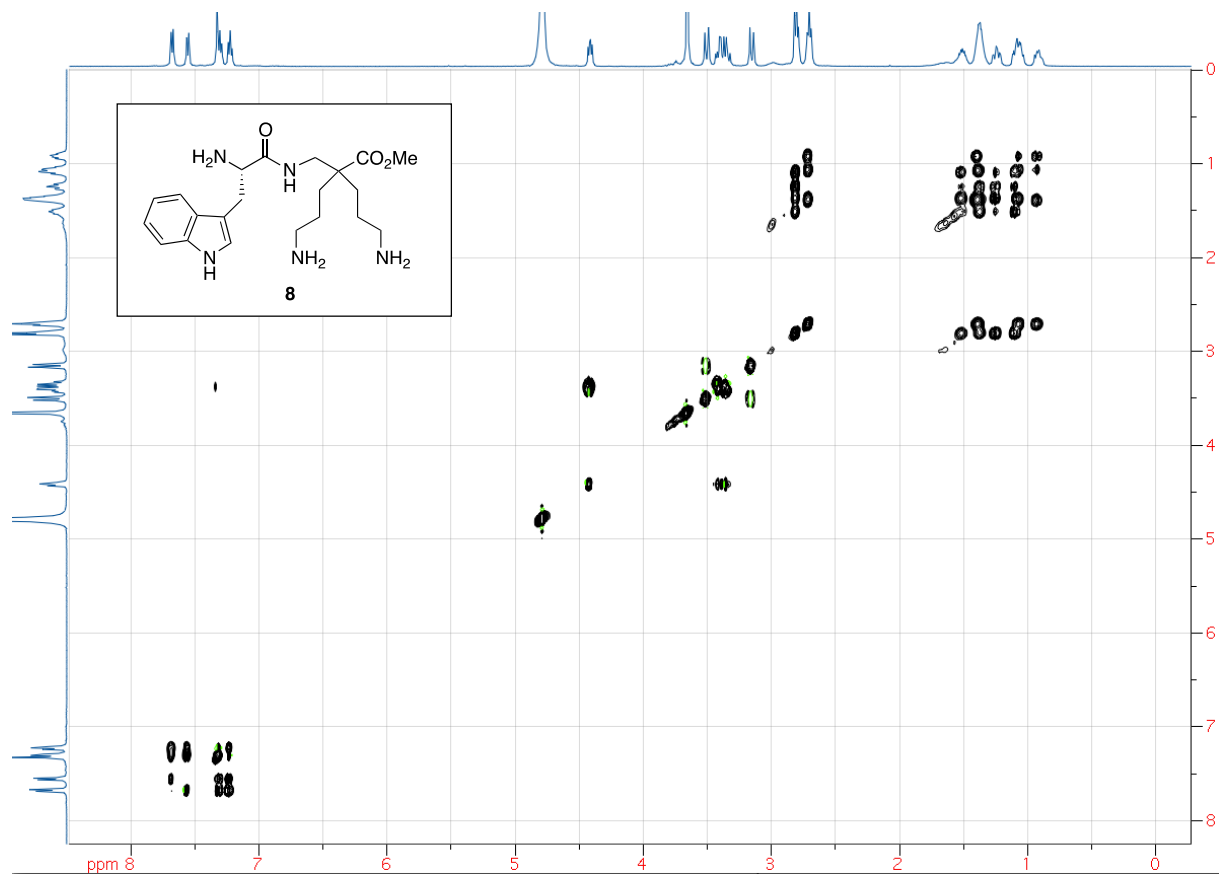

<sup>1</sup>H NMR spectra of Gua-Trp-β<sup>2,2</sup>h bis-Arg-OMe 10, 300MHz, D<sub>2</sub>O

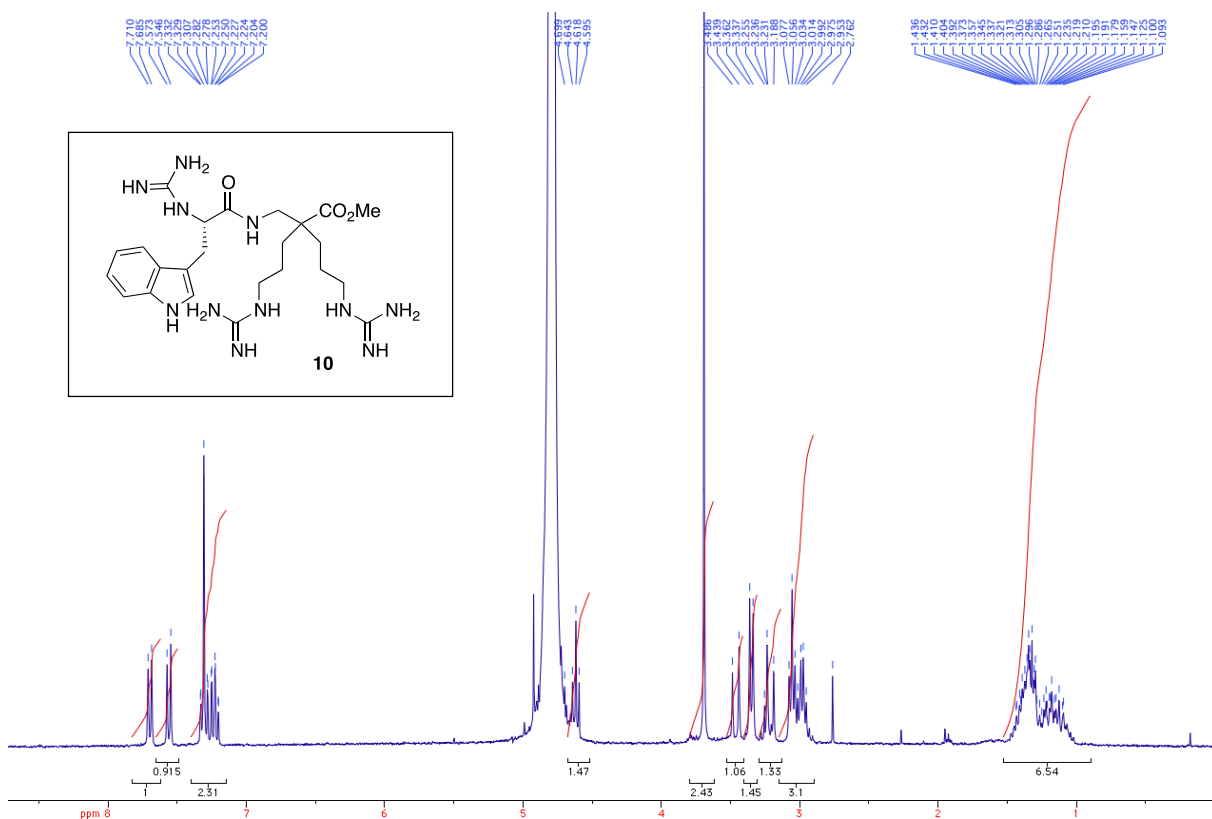

COSY NMR spectra of Gua-Trp-β<sup>2,2</sup>h bis-Arg-OMe 10, 300MHz, CD<sub>3</sub>OD

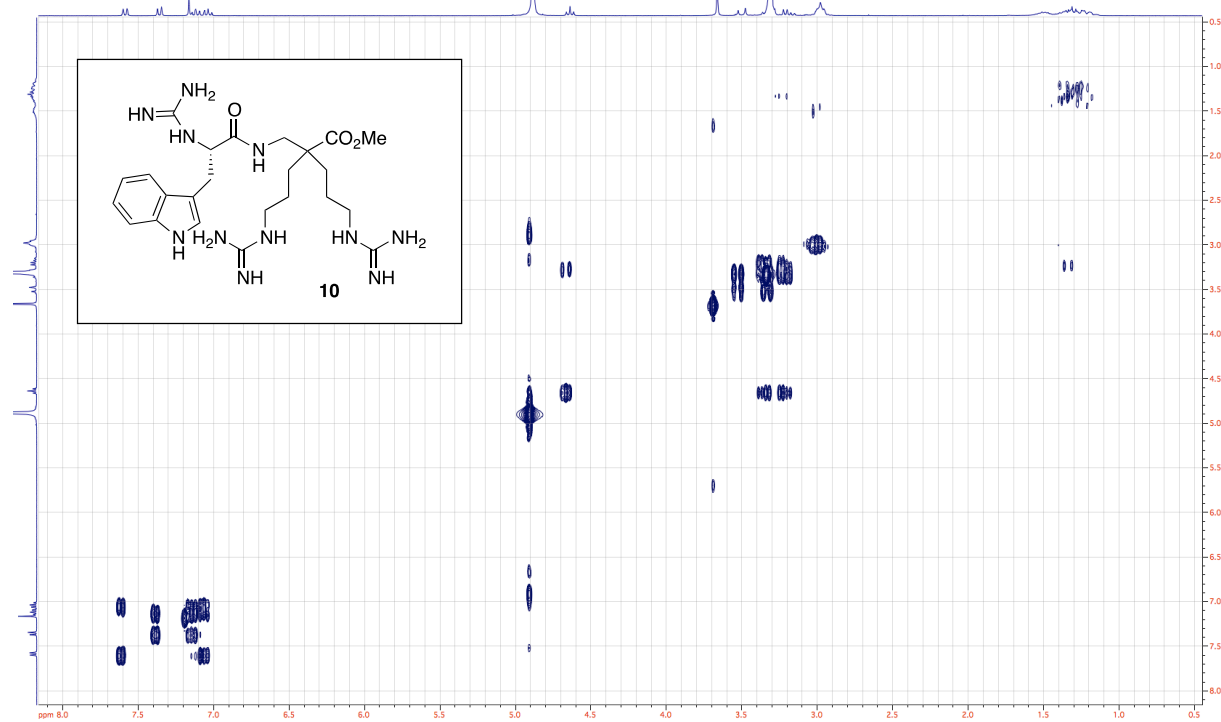



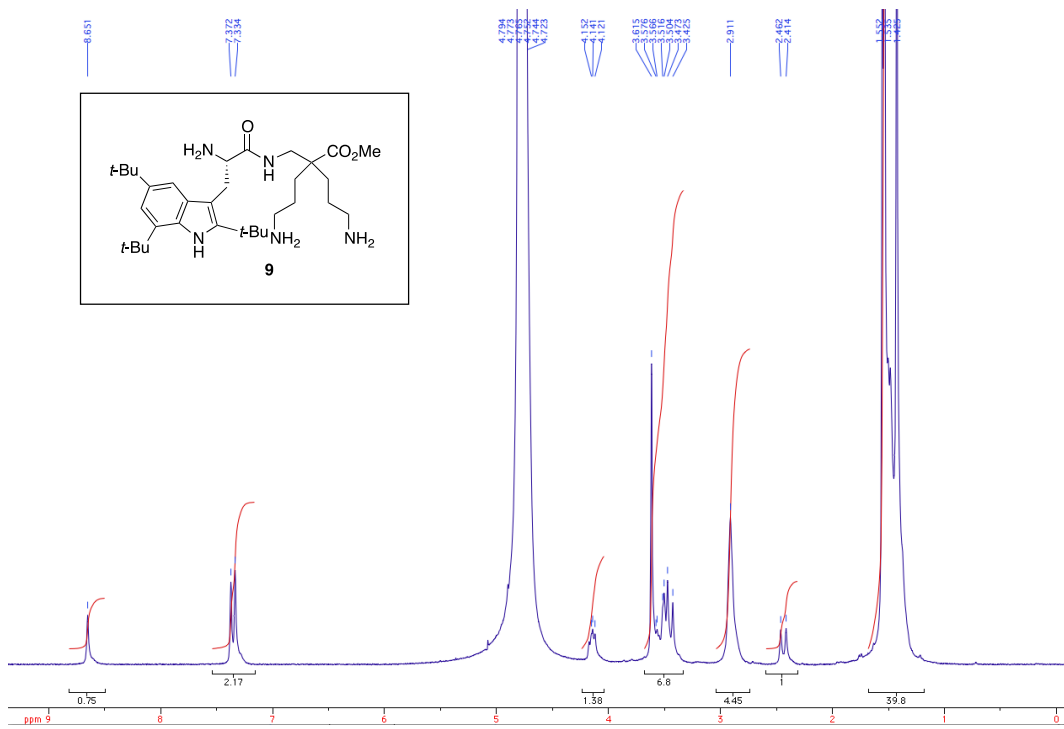

**<sup>1</sup>H NMR spectra of H-Tbt-β<sup>2.2</sup>h bis-OrnOMe 9, 300MHz, D<sub>2</sub>O**

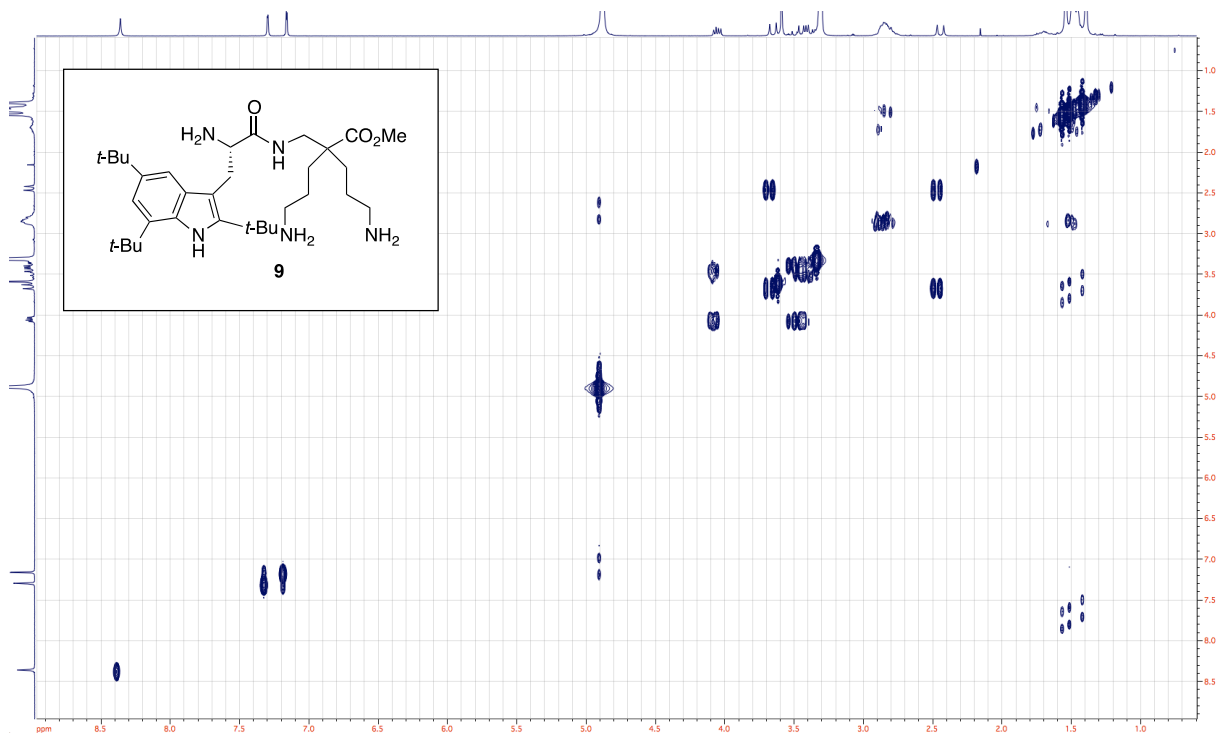



**<sup>1</sup>H NMR spectra of H-Tbt-β<sup>2,2</sup>h bis-Arg-OMe 11, 500MHz, D<sub>2</sub>O**

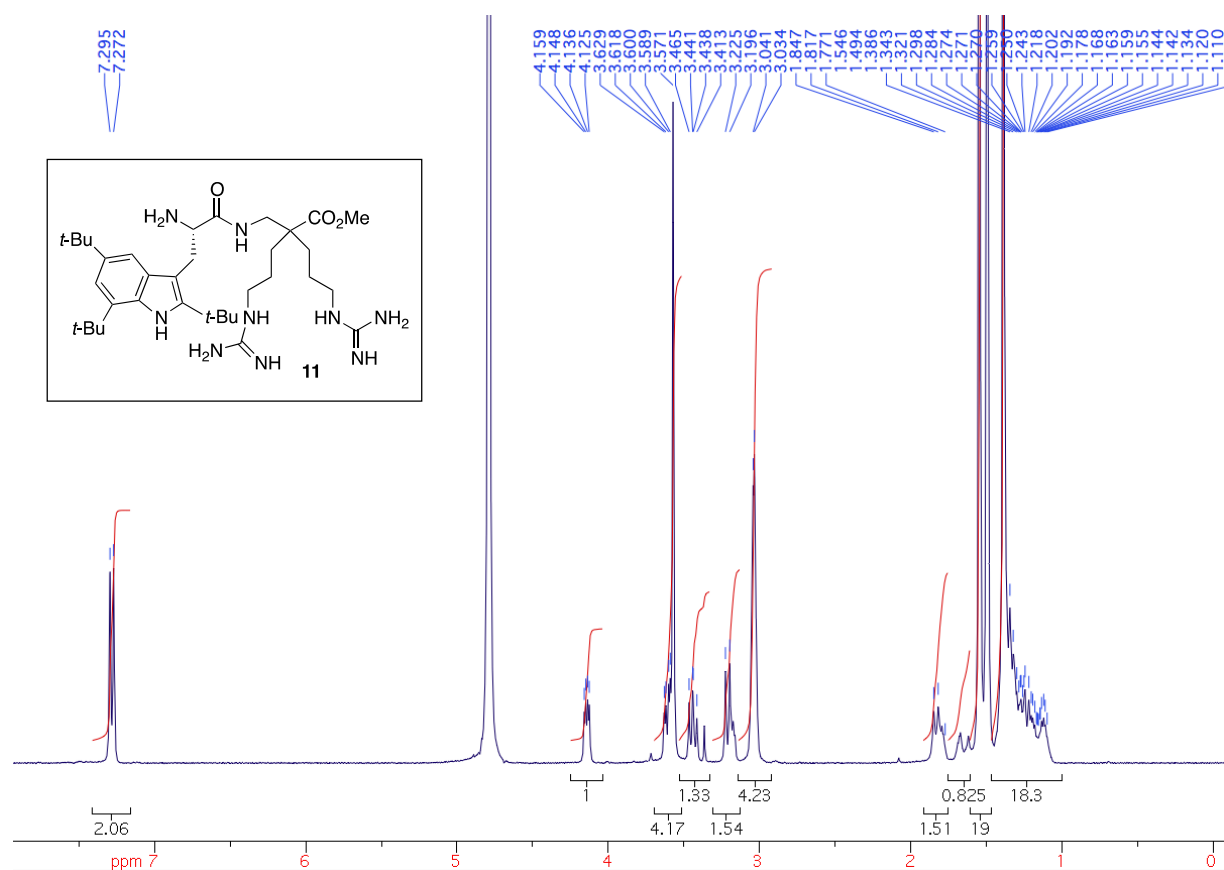

**COSY NMR spectra of H-Tbt-β<sup>2,2</sup>h bis-Arg-OMe 11, 500MHz, D<sub>2</sub>O**

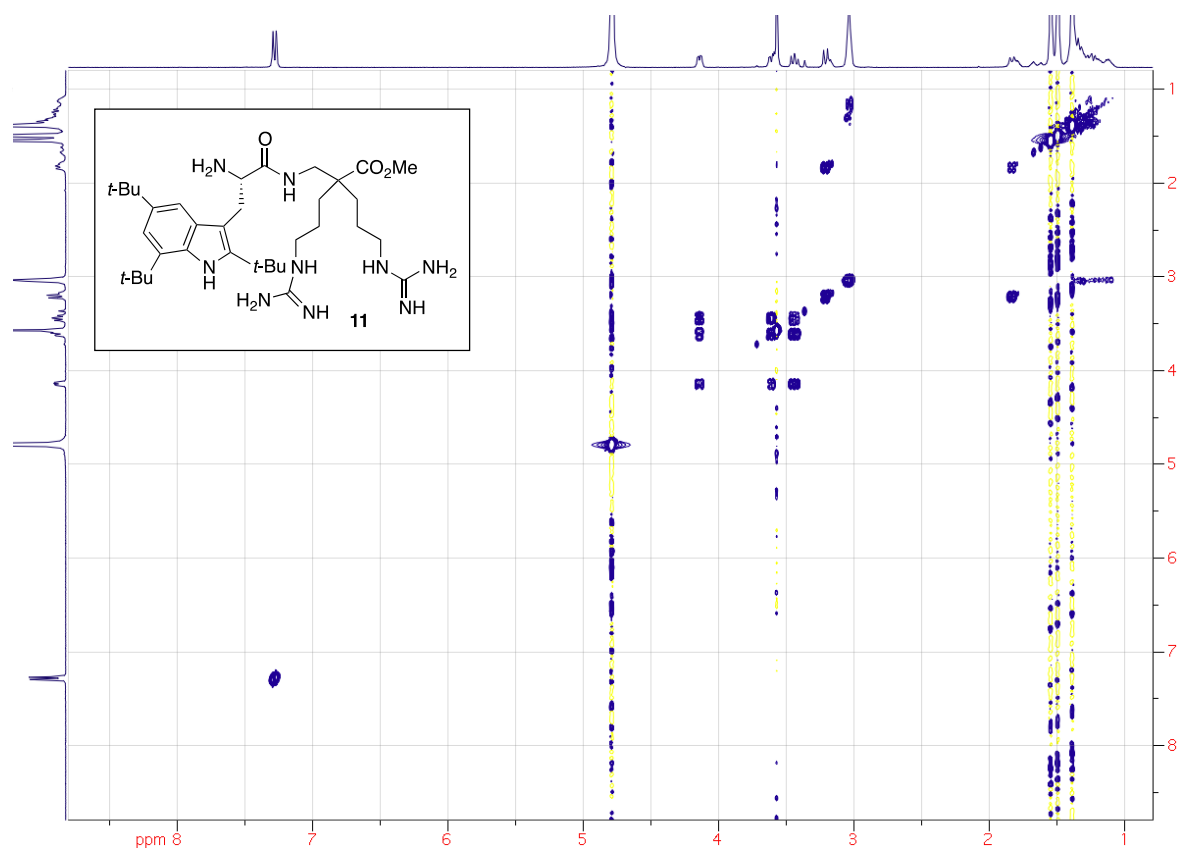

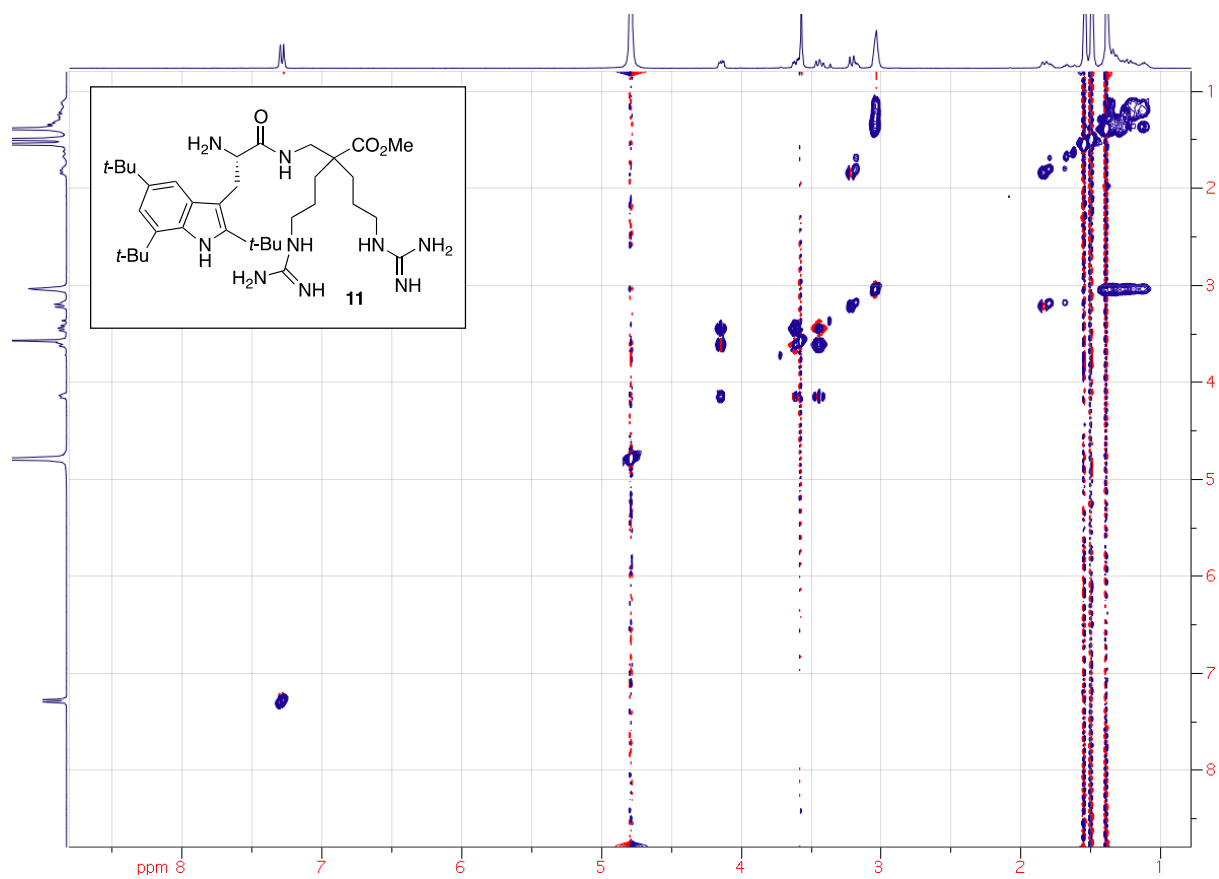

$^1\text{H}$  NMR spectra of Gdm-Tbt- $\beta^{2,2}h$  bis-Arg-OMe 12, 400MHz, MeOD

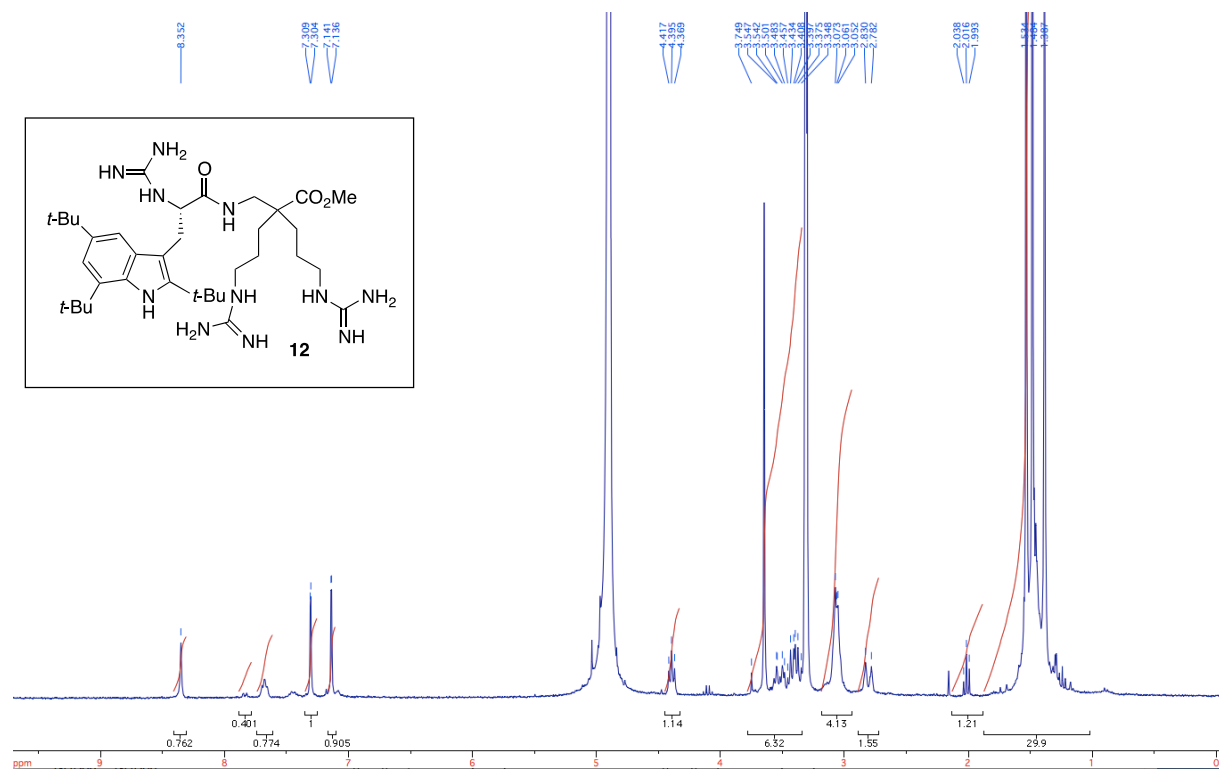

$^1\text{H}$  NMR spectra of H- $\beta^{3,3}h$  bis-Arg-Tbt-OMe 13, 500MHz, D<sub>2</sub>O

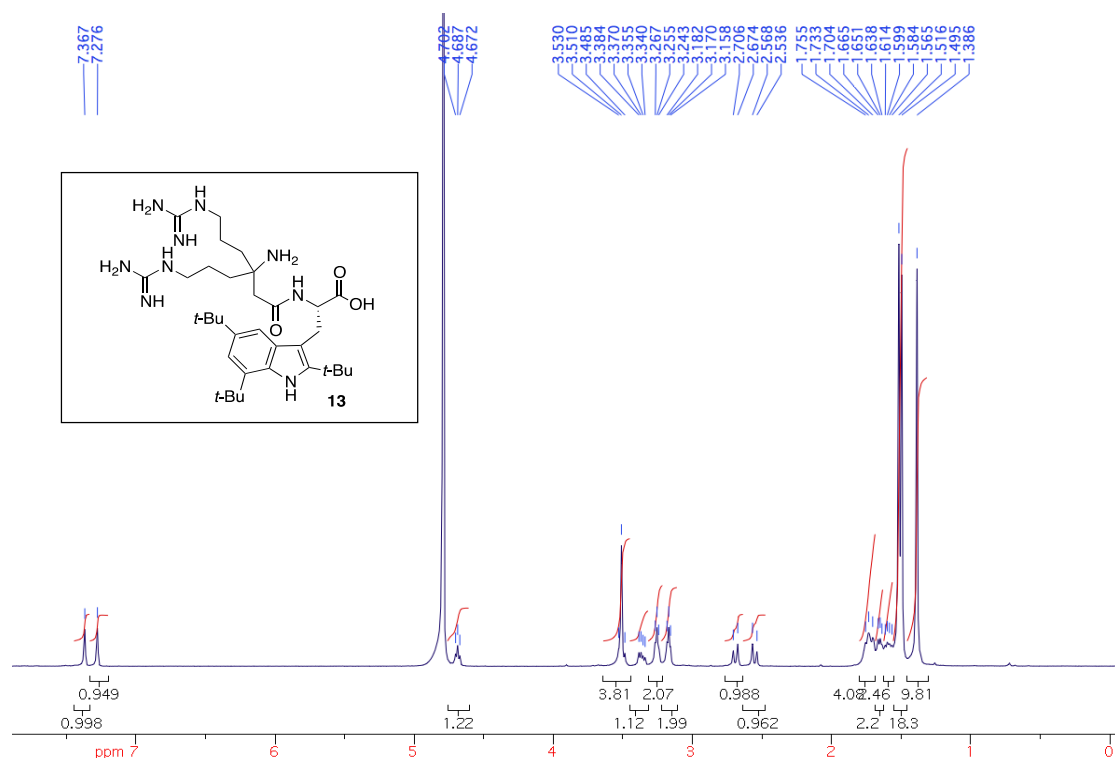

COSY NMR spectra of H- $\beta^{3,3}h$  bis-Arg-Tbt-OMe 13, 500MHz, D<sub>2</sub>O

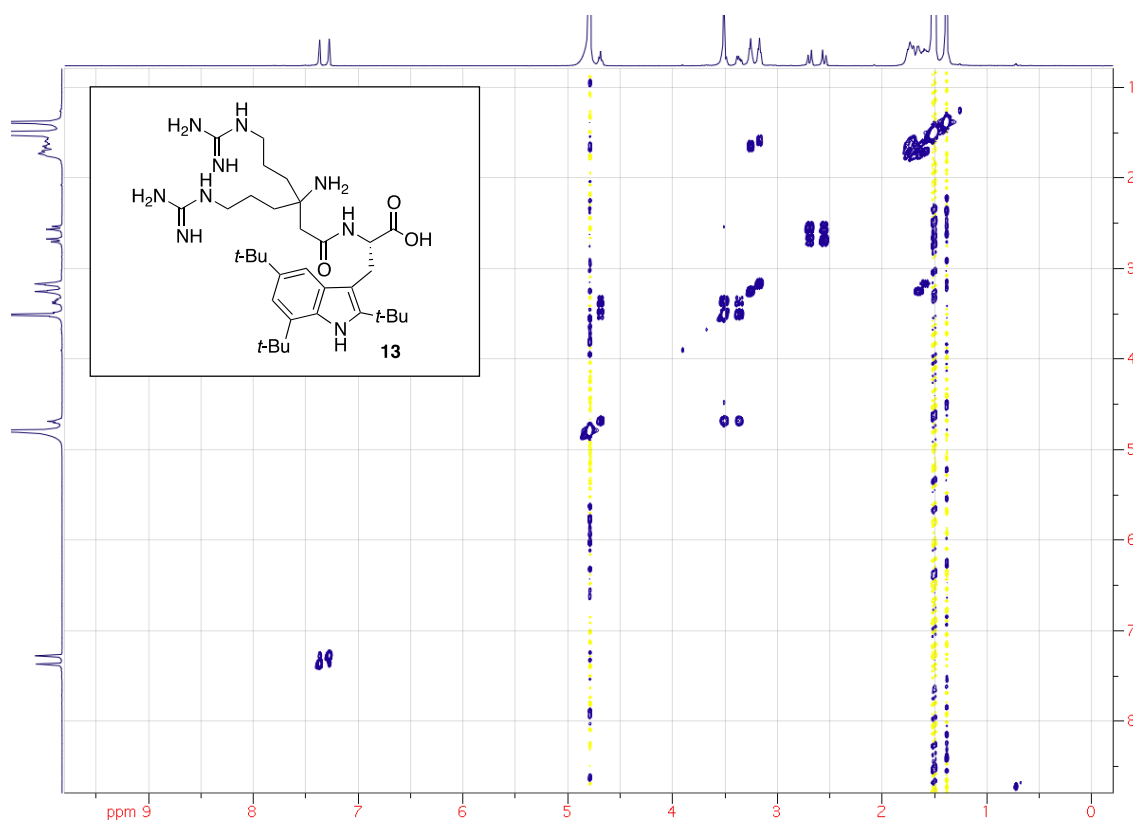

TOCSY NMR spectra of H- $\beta^{3,3}$  *h* bis-Arg-Tbt-OMe 13, 500MHz, D<sub>2</sub>O

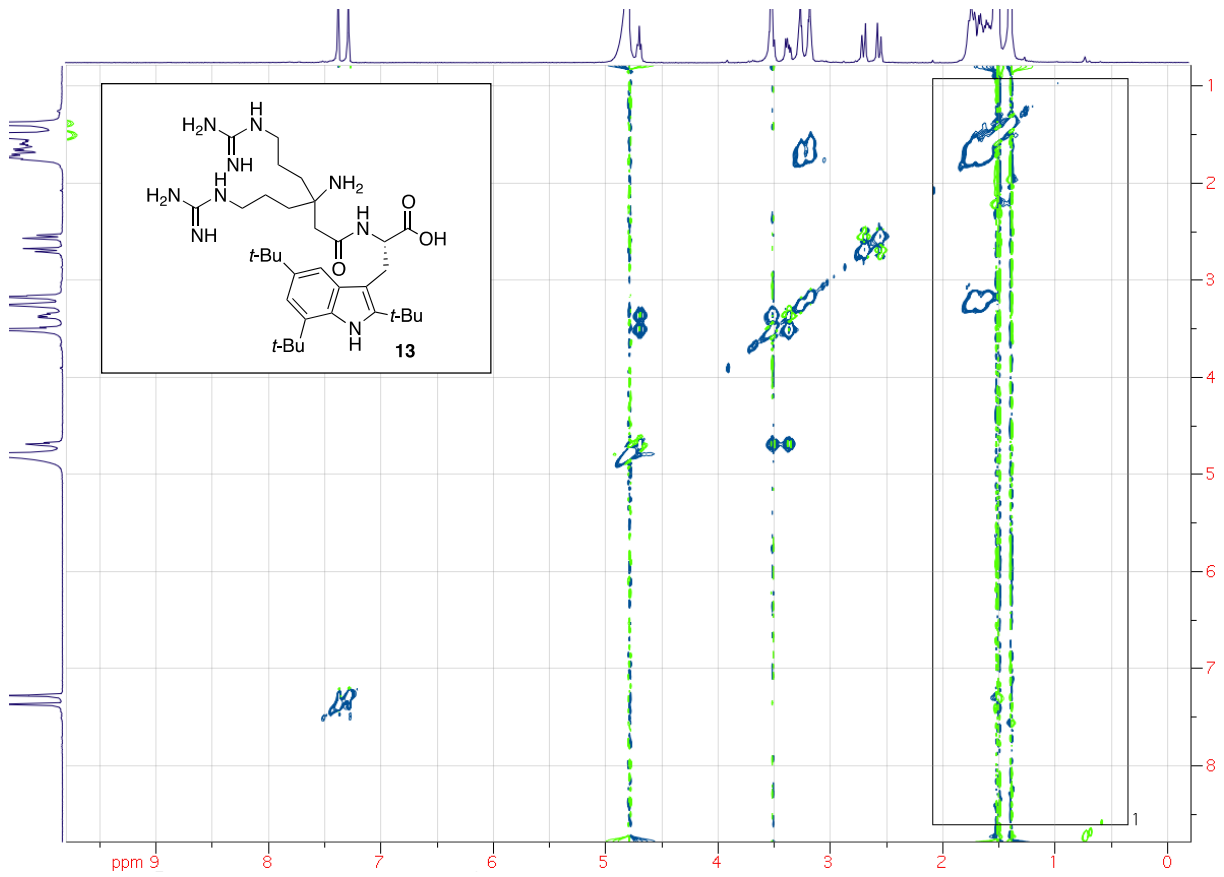

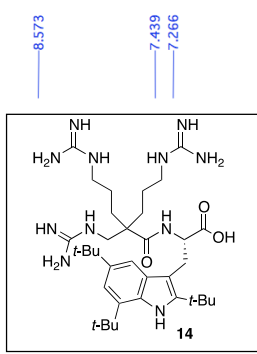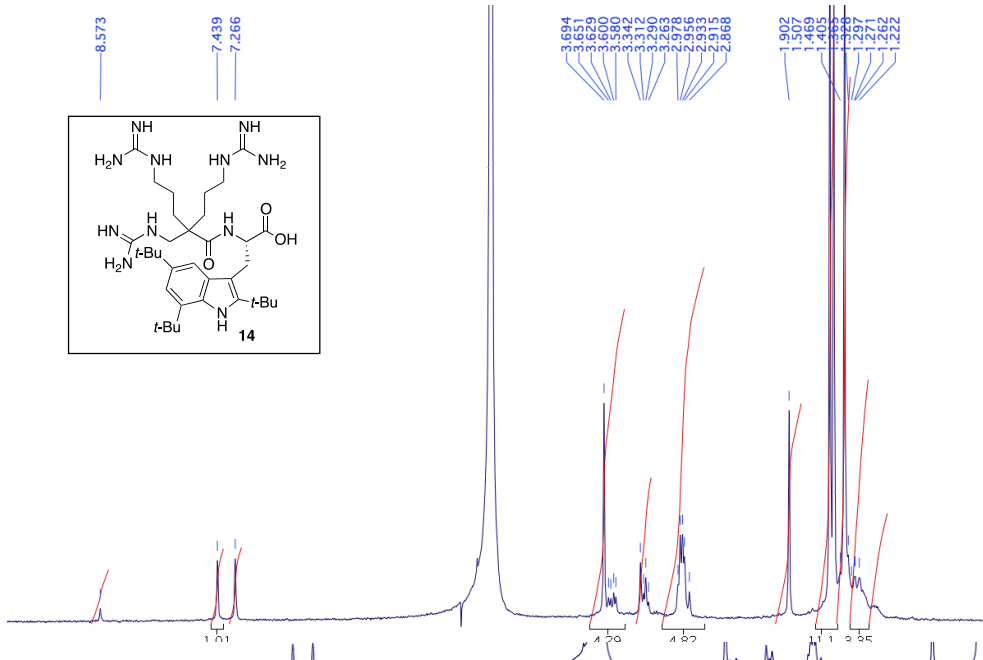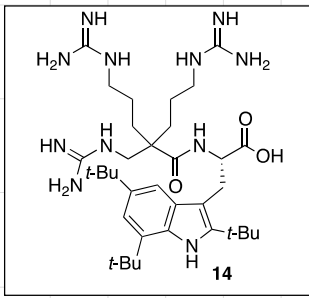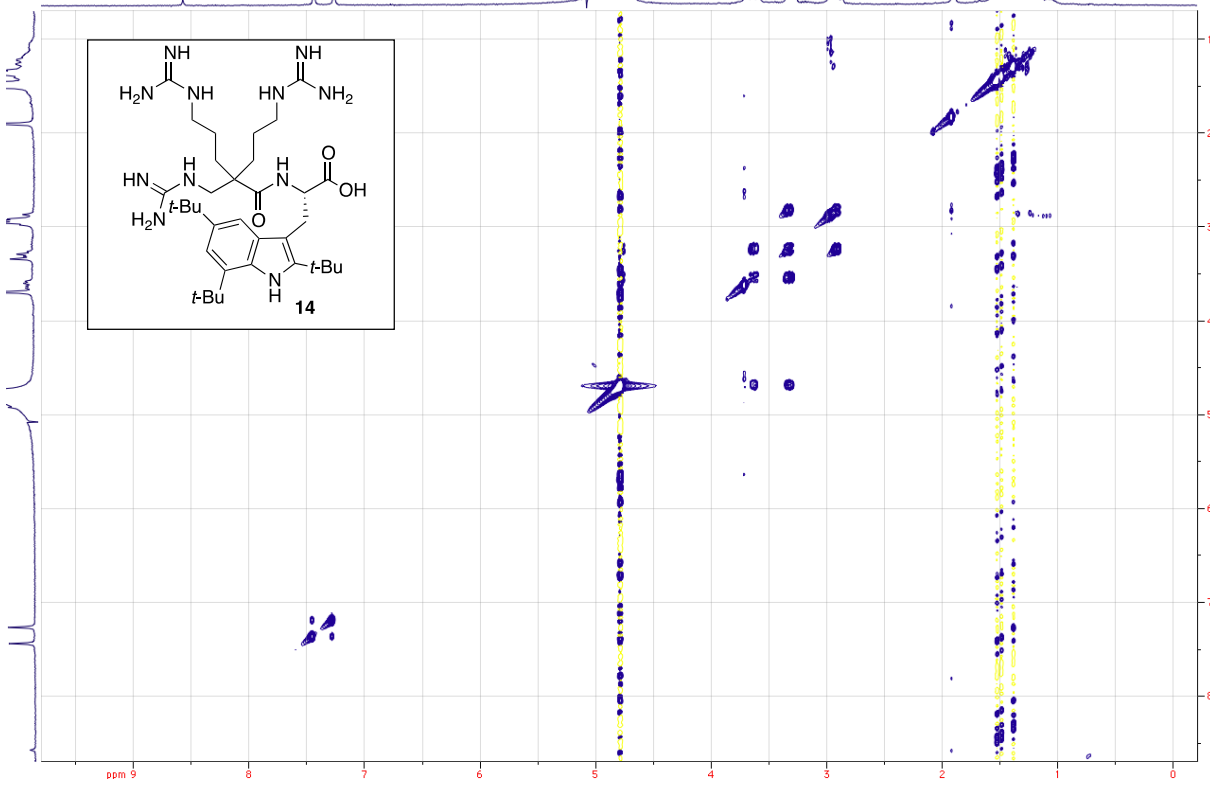

TOCSY NMR spectra of Gua- $\beta^{2,2}h$  bis-Arg-Tbt-OMe 14, 500MHz, D<sub>2</sub>O

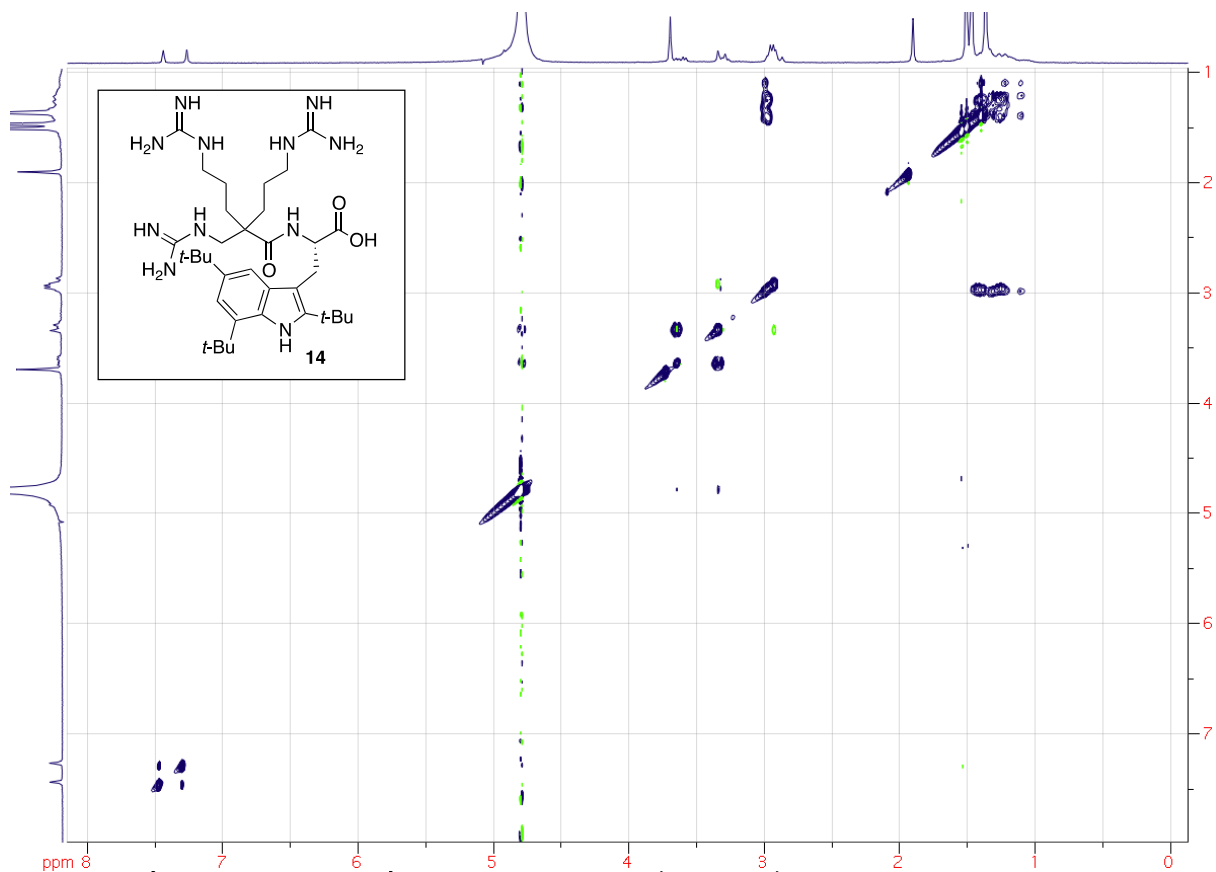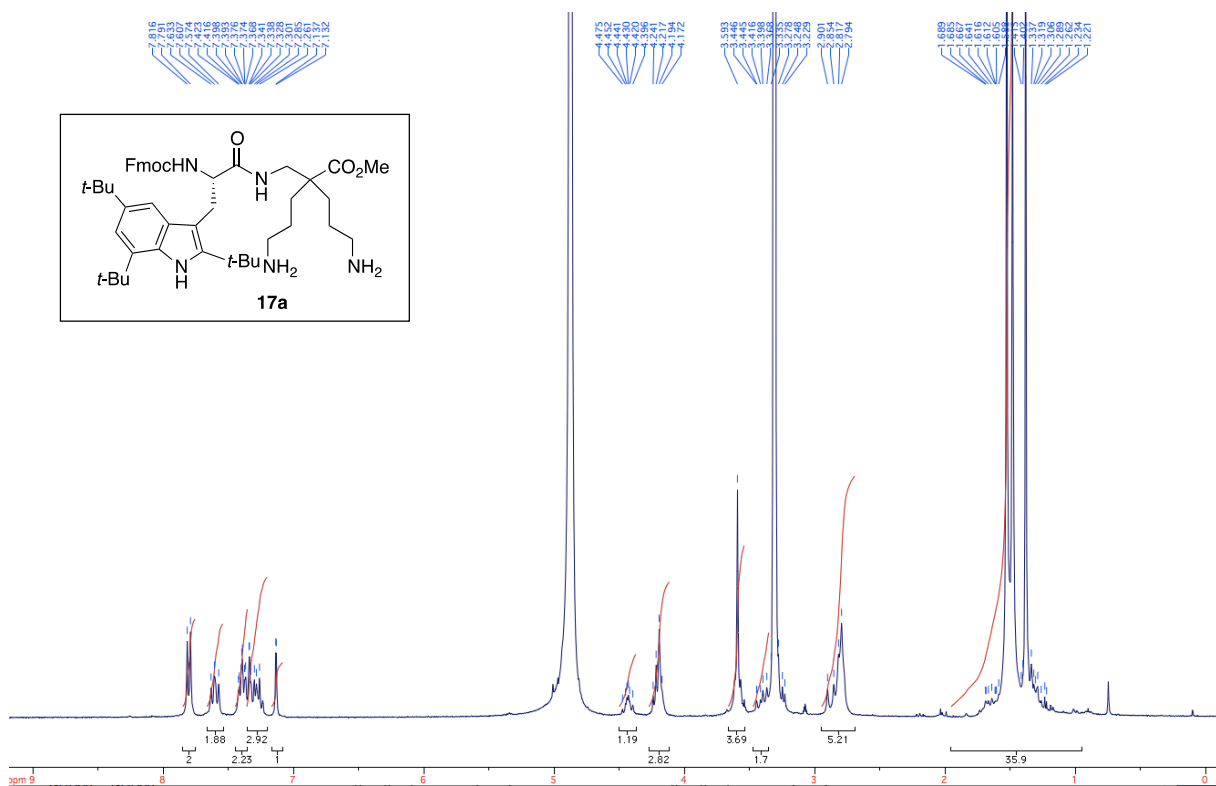

<sup>1</sup>H NMR spectra of Fmoc-Tbt- $\beta^{2,2}h$  bis-Arg-OMe 17b, 300MHz, CD<sub>3</sub>OD

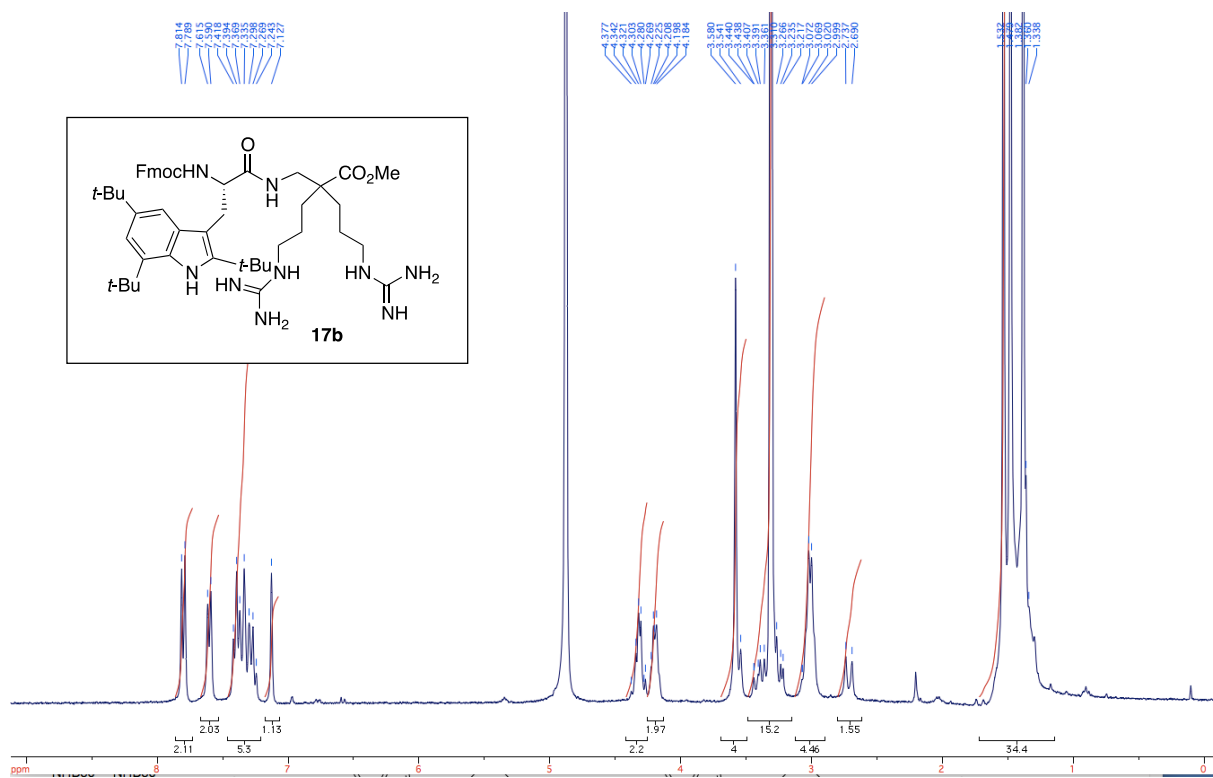

<sup>1</sup>H NMR spectra of Fluo-Tbt-β<sup>2,2</sup>h bis-Orn-OMe 18, 300MHz, CD<sub>3</sub>OD

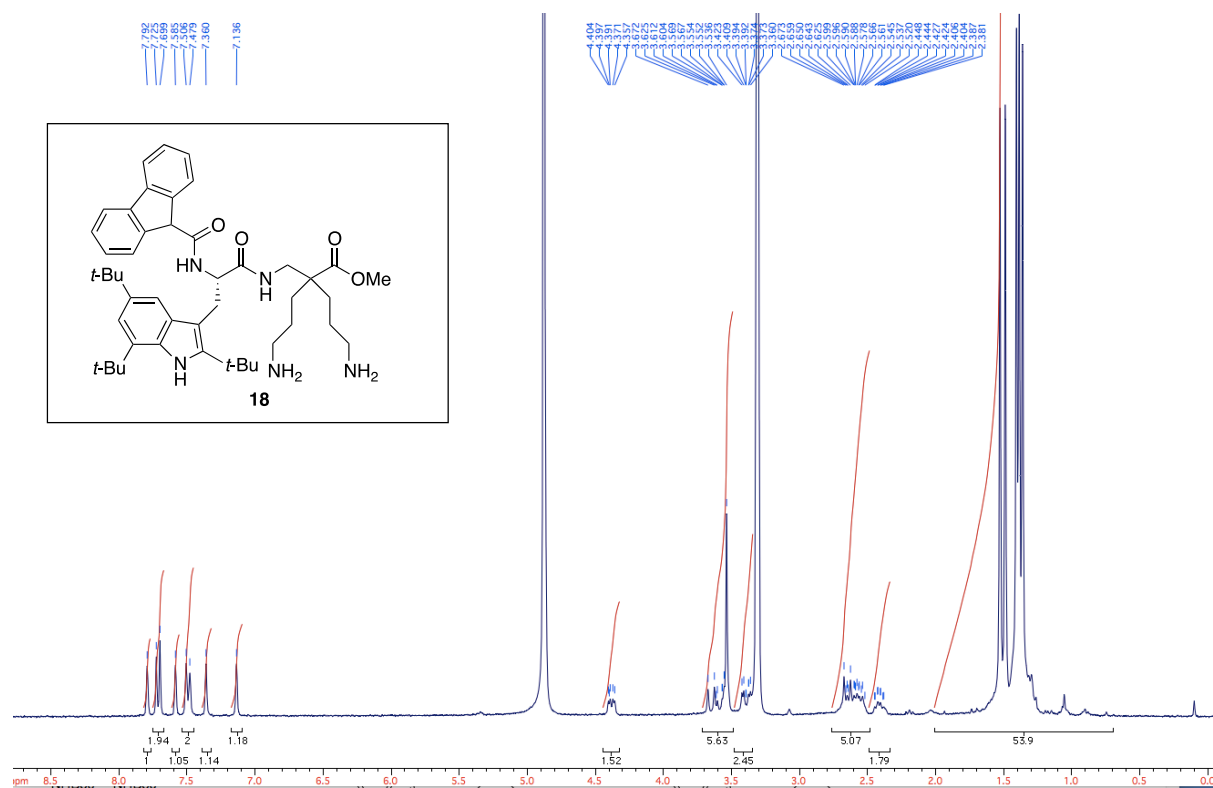

<sup>1</sup>H NMR spectra of Np-Tbt-β<sup>2,2</sup>h bis-Orn-OMe 19, 300MHz, CD<sub>3</sub>OD

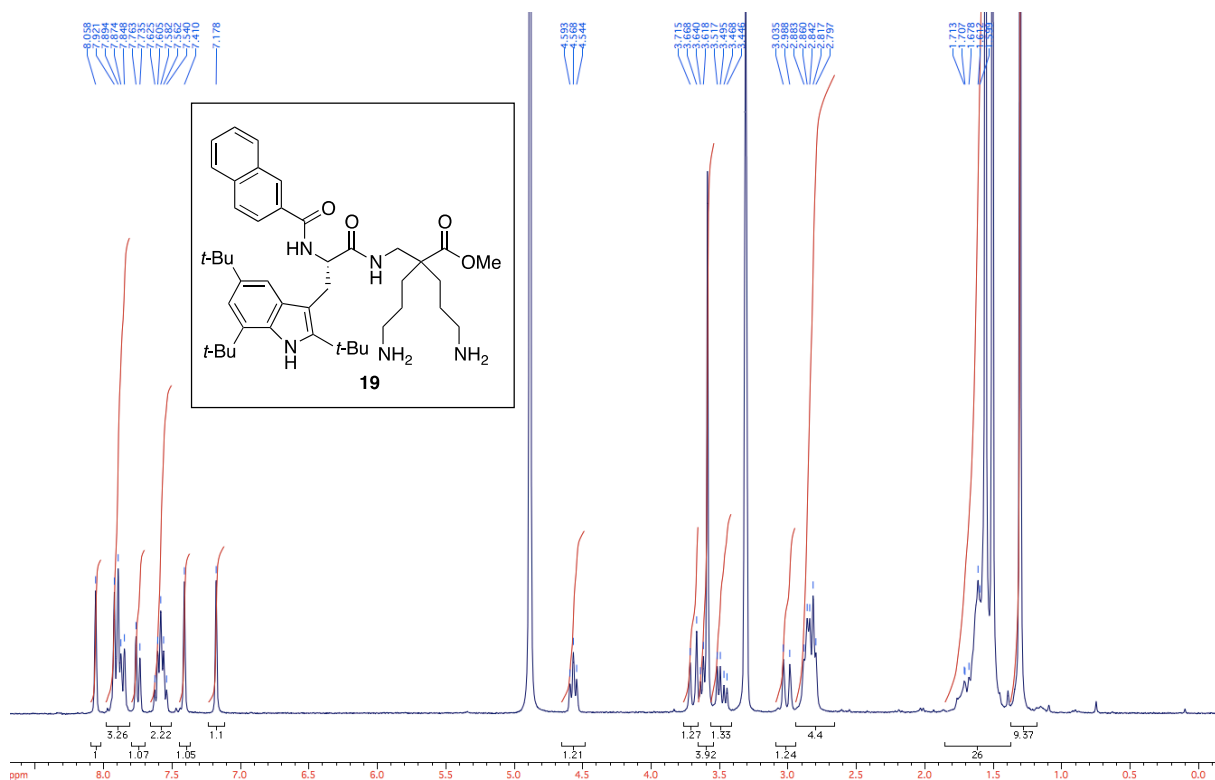

<sup>1</sup>H NMR spectra of H-β<sup>2,2</sup>h bis-Orn(Boc)<sub>2</sub>OBn 27, 300 MHz, CD<sub>3</sub>OD

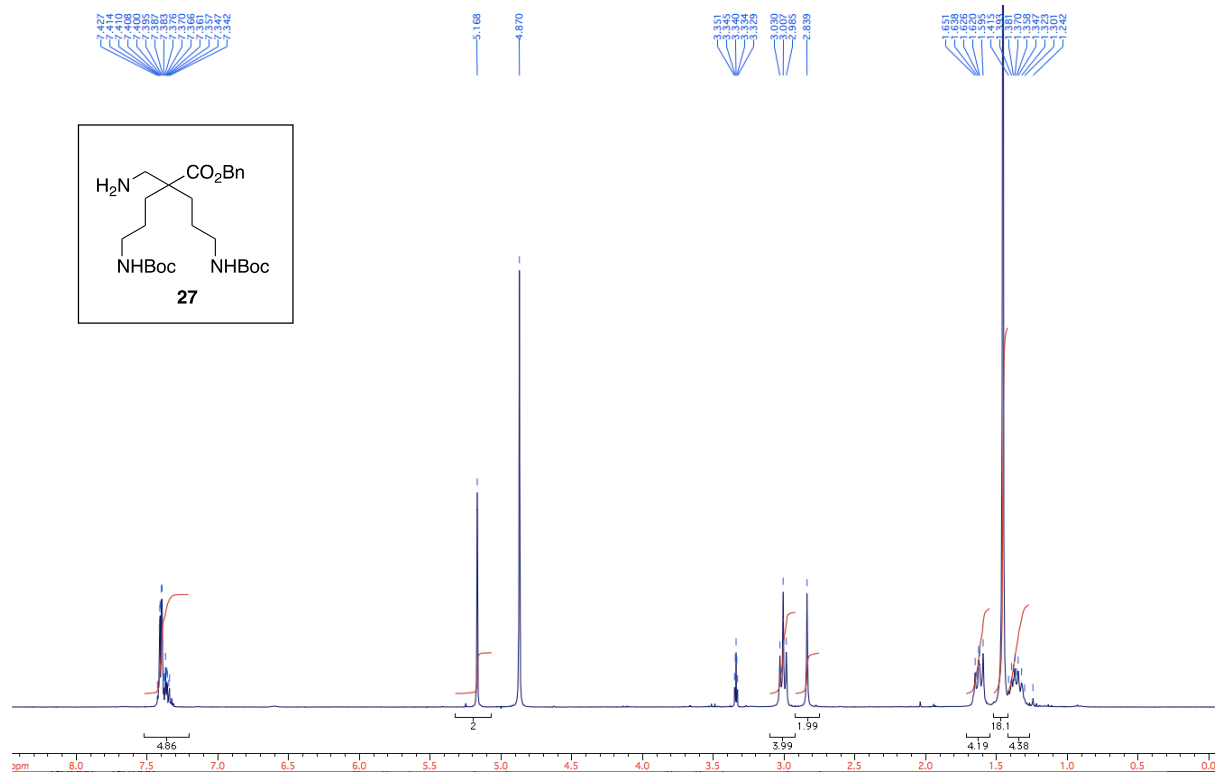



<sup>13</sup>C NMR spectra of H-β<sup>2,2</sup>h bis-Orn(Boc)<sub>2</sub>OBn 27, 300 MHz, CD<sub>3</sub>OD

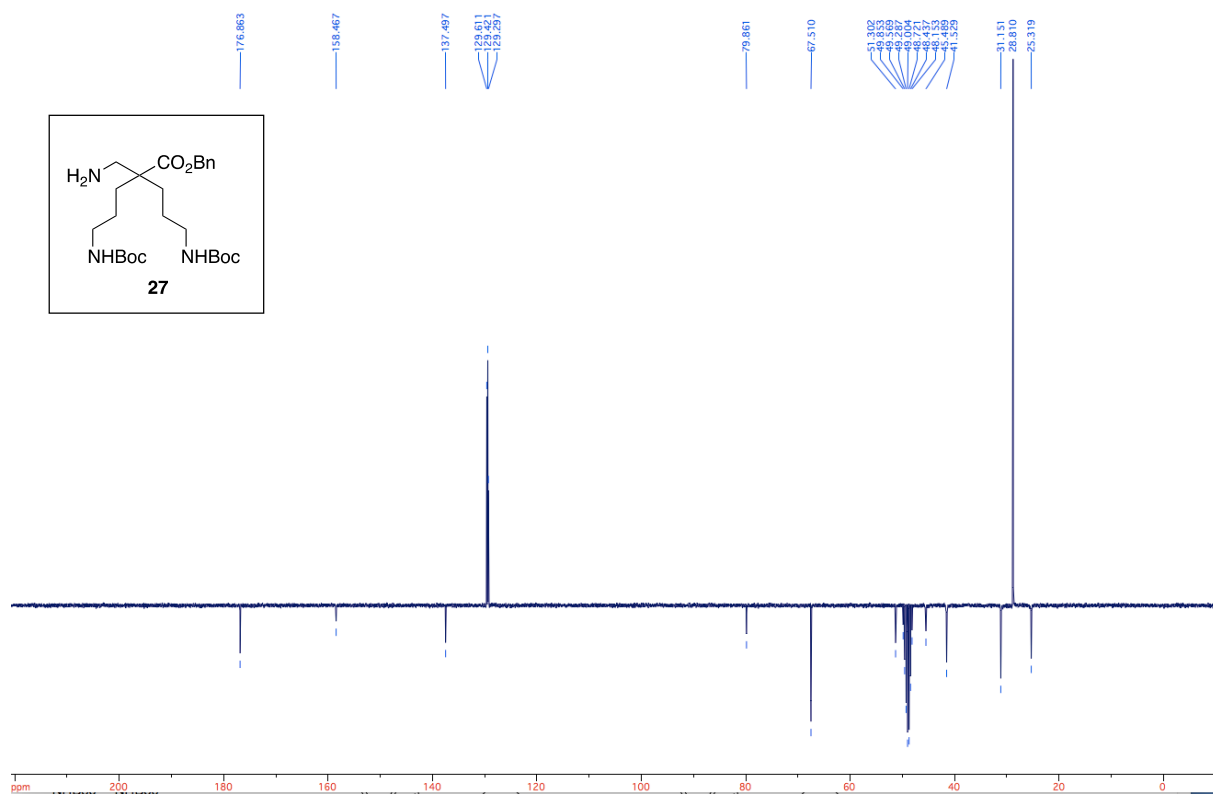

<sup>1</sup>H NMR spectra of Fmoc-Tbt-β<sup>2,2</sup>h bis-Orn(Boc)<sub>2</sub>OBn 28, 300MHz, CD<sub>3</sub>OD

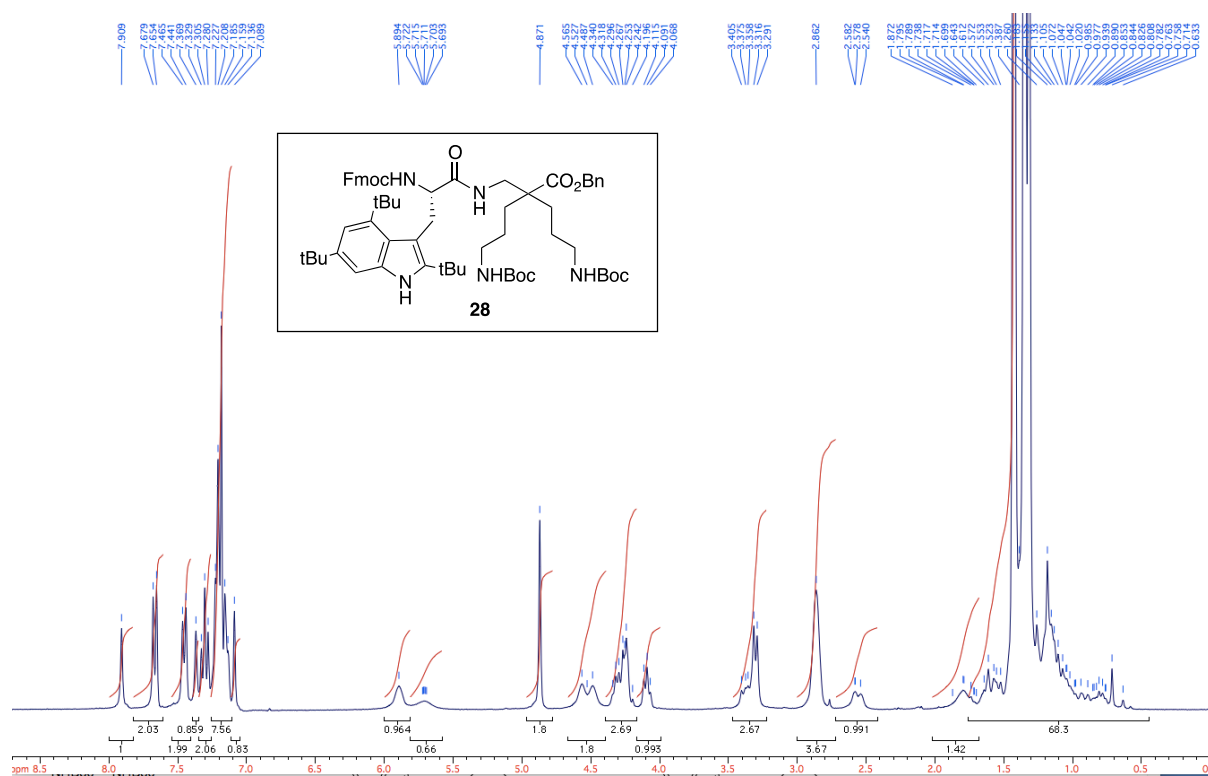

**<sup>1</sup>H NMR spectra of H-Tbt-β<sup>2,2</sup>h bis-Arg-OBn 20, 300MHz, CD<sub>3</sub>OD**

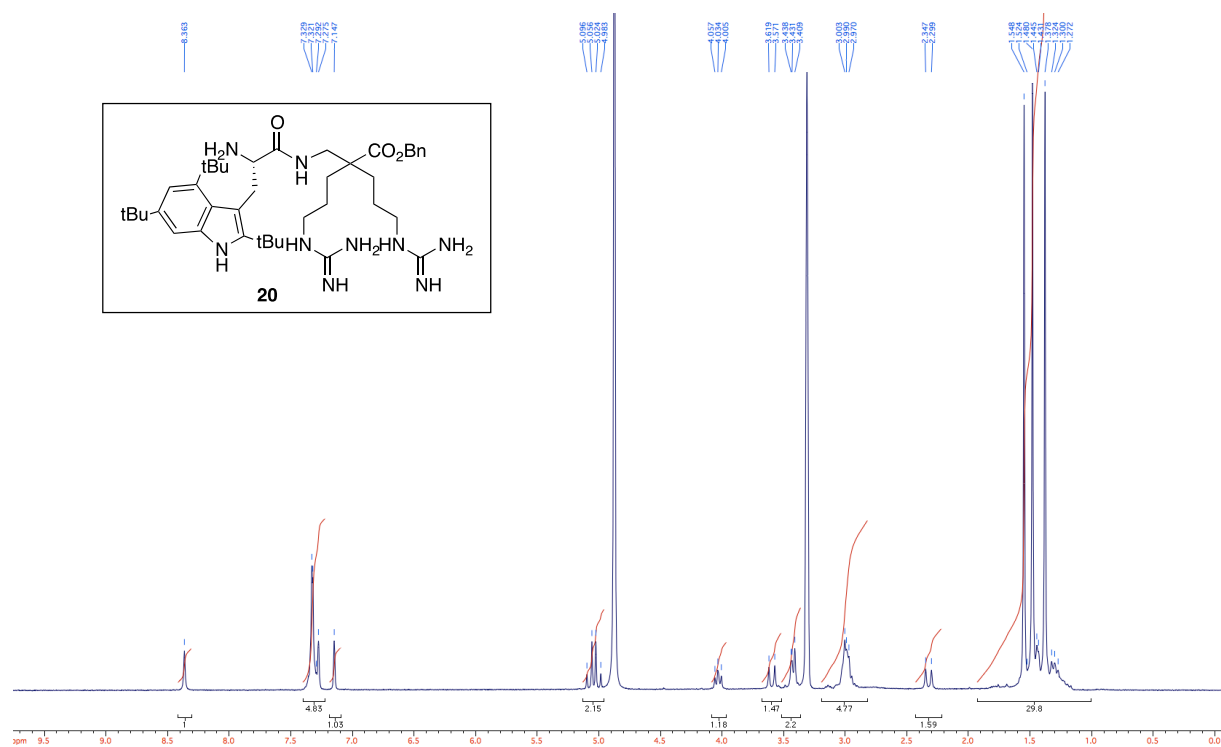

**COSY NMR spectra of H-Tbt-β<sup>2,2</sup>h bis-Arg-OBn 20, 300MHz, CD<sub>3</sub>OD**

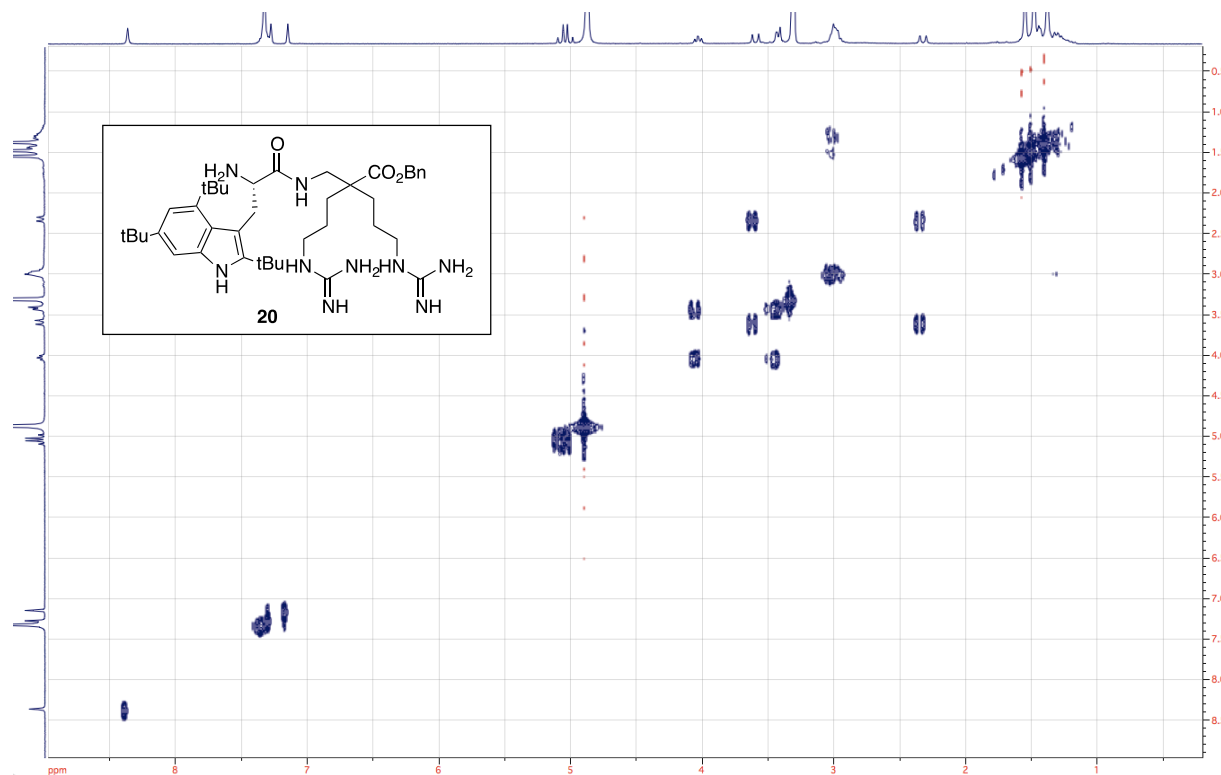



$^1\text{H}$  NMR spectra of H- $\beta^{2,2}h$  bis-Orn(Boc) $_2$ NHBn **29**, 300 MHz, CD $_3$ OD

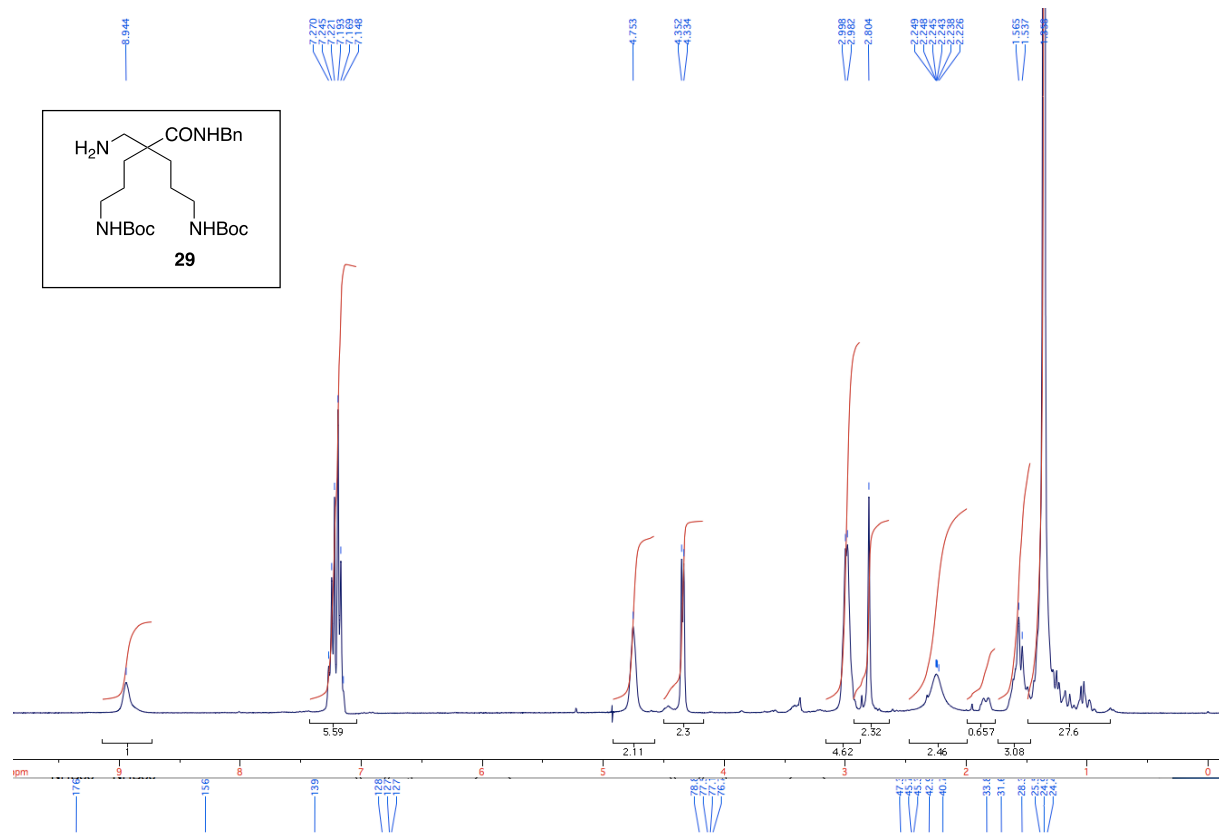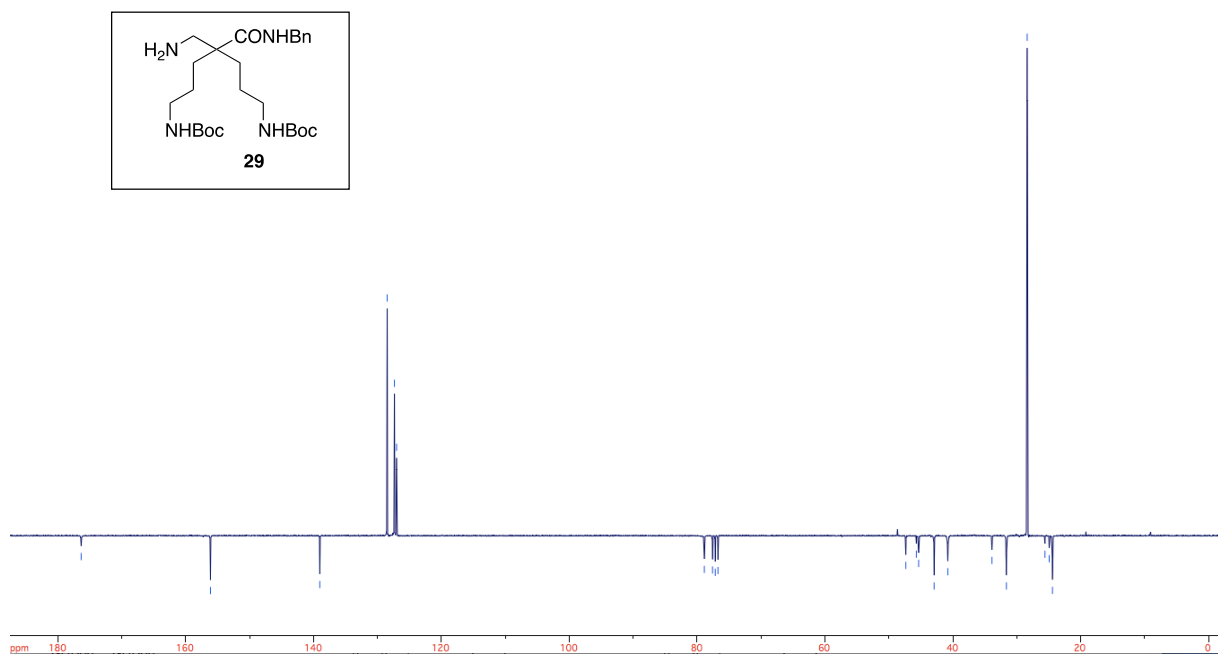

**<sup>1</sup>H NMR spectra of Fmoc-Tbt-β<sup>2,2</sup>h bis-Orn(Boc)<sub>2</sub>-NHBn 30, 300MHz, CD<sub>3</sub>OD**

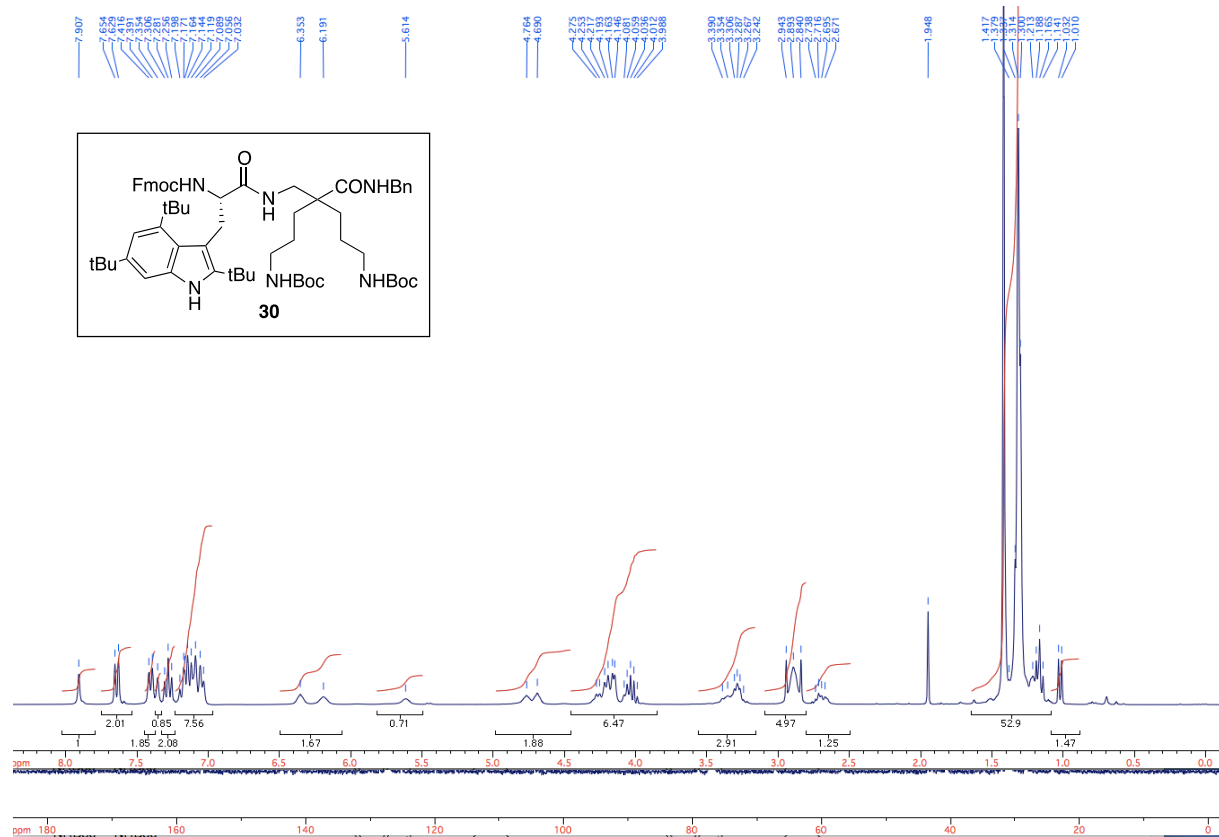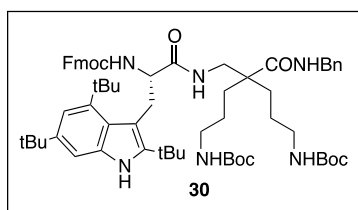

<sup>1</sup>H NMR spectra of H-Tbt-β<sup>2,2</sup>h bis-Arg-NHBn 21, 300MHz, CD<sub>3</sub>OD

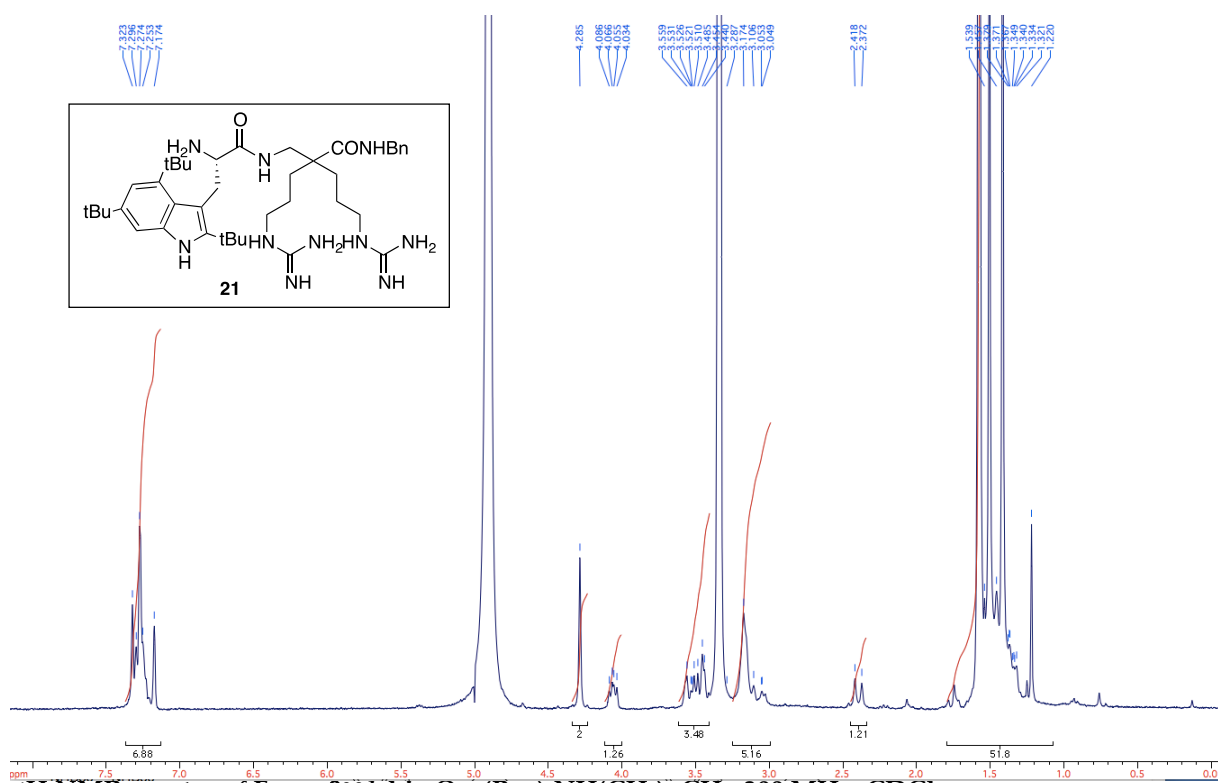

<sup>1</sup>H NMR spectra of Fmoc-β<sup>2,2</sup>h bis-Orn(Boc)<sub>2</sub>NH(CH<sub>2</sub>)<sub>13</sub>CH<sub>3</sub>, 300 MHz, CDCl<sub>3</sub>
